1 **Real time monitoring of peptidoglycan synthesis by membrane-reconstituted penicillin**  
2 **binding proteins**

3 Víctor M. Hernández-Rocamora<sup>1\*</sup>, Natalia Baranova<sup>2\*</sup>, Katharina Peters<sup>1</sup>, Eefjan Breukink<sup>3</sup>,  
4 Martin Loose<sup>2#</sup>, Waldemar Vollmer<sup>1#</sup>

5

6 <sup>1</sup> Centre for Bacterial Cell Biology, Biosciences Institute, Newcastle University, Richardson  
7 Road, Newcastle upon Tyne, NE2 4AX, UK.

8 <sup>2</sup>Institute for Science and Technology Austria (IST Austria), Klosterneuburg, Austria

9 <sup>3</sup>Membrane Biochemistry and Biophysics, Bijvoet Centre for Biomolecular Research,  
10 University of Utrecht, Padualaan 8, 3584 Utrecht, The Netherlands.

11

12 \* Contributed equally.

13 # Correspondence: [w.vollmer@newcastle.ac.uk](mailto:w.vollmer@newcastle.ac.uk); [martin.loose@ist.ac.at](mailto:martin.loose@ist.ac.at).

14

15

16 **ABSTRACT**

17 Peptidoglycan is an essential component of the bacterial cell envelope that surrounds the  
18 cytoplasmic membrane to protect the cell from osmotic lysis. Important antibiotics such as  $\beta$ -  
19 lactams and glycopeptides target peptidoglycan biosynthesis. Class A penicillin binding  
20 proteins are bifunctional membrane-bound peptidoglycan synthases that polymerize glycan  
21 chains and connect adjacent stem peptides by transpeptidation. How these enzymes work in  
22 their physiological membrane environment is poorly understood. Here we developed a novel  
23 FRET-based assay to follow in real time both reactions of class A PBPs reconstituted in  
24 liposomes or supported lipid bilayers and we demonstrate this assay with PBP1B homologues  
25 from *Escherichia coli*, *Pseudomonas aeruginosa* and *Acinetobacter baumannii* in the  
26 presence or absence of their cognate lipoprotein activator. Our assay allows unravelling the  
27 mechanisms of peptidoglycan synthesis in a lipid-bilayer environment and can be further  
28 developed to be used for high throughput screening for new antimicrobials.

## 29 INTRODUCTION

30 Peptidoglycan (PG) is a major cell wall polymer in bacteria. It is composed of glycan strands  
31 of alternating N-actetylglucosamine (GlcNAc) and N-acetylmuramic acid (MurNAc) residues  
32 interconnected by short peptides. PG forms a continuous, mesh-like layer around the cell  
33 membrane to protect the cell from bursting due to the turgor and to maintain cell shape  
34 (Vollmer *et al.*, 2008). The essentiality and conservation of PG in bacteria make  
35 peptidoglycan metabolism an ideal target of antibiotics.

36 Class A penicillin-binding proteins (PBPs) are bifunctional PG synthases, which uses  
37 the precursor lipid II to polymerize glycan chains (glycosyltransferase reactions) and  
38 crosslink peptides from adjacent chains by DD-transpeptidation (Goffin & Ghuysen, 1998).  
39 Moenomycin inhibits the glycosyltransferase and  $\beta$ -lactams the transpeptidase function of  
40 class A PBPs (Sauvage & Terrak, 2016, Macheboeuf *et al.*, 2006). In *E. coli*, PBP1A and  
41 PBP1B account for a substantial proportion of the total cellular PG synthesis activity (Cho *et al.*,  
42 2016) and they are tightly regulated by interactions with multiple proteins (Egan *et al.*,  
43 2015, Typas *et al.*, 2012, Egan *et al.*, 2017, Egan *et al.*, 2020), including the outer membrane  
44 anchored activators LpoA and LpoB (Egan *et al.*, 2018, Typas *et al.*, 2010, Jean *et al.*, 2014).

45 Historically, *in vitro* PG synthesis assays have been crucial to decipher the  
46 biochemical reactions involved in PG synthesis and determine the mode of action of  
47 antibiotics (Izaki *et al.*, 1968). However, these studies were limited by the scarcity of lipid II  
48 substrate and the inability to purify a sufficient quantity of active enzymes. Lipid II can now  
49 be synthesized chemically (VanNieuwenhze *et al.*, 2002, Schwartz *et al.*, 2001, Ye *et al.*,  
50 2001) or semi-enzymatically (Breukink *et al.*, 2003, Egan *et al.*, 2015), or isolated from cells  
51 with inactivated MurJ (Qiao *et al.*, 2017). Radioactive or fluorescent versions of lipid II are  
52 also available to study PG synthesis in the test tube. However, there are several drawbacks  
53 with currently available PG synthesis assays. First, most assays are end-point assays that rely  
54 on discrete sampling and therefore do not provide real-time information about the enzymatic  
55 reaction. Second, some assays involve measuring the consumption of lipid II or analysing the  
56 reaction products by SDS-PAGE (Egan *et al.*, 2015, Barrett *et al.*, 2007, Qiao *et al.*, 2014,  
57 Sjodt *et al.*, 2018) or HPLC after digestion with a muramidase (Bertsche *et al.*, 2005, Born *et al.*,  
58 2006). These laborious techniques make assays incompatible with high through-put  
59 screening and hinder the determination of kinetic parameters. A simple, real-time assay with  
60 dansyl-labelled lipid II substrate overcomes these problems but is limited to assay GTase  
61 reactions (Schwartz *et al.*, 2001, Offant *et al.*, 2010, Egan *et al.*, 2015).

62           Recently two types of real-time TPase assays have been described. The first uses non-  
63 natural mimics of TPase substrates such as the rotor-fluorogenic 470 D-lysine probe  
64 Rf470DL, which increases its fluorescence emission upon incorporation into PG (Hsu *et al.*,  
65 2019). The second assay monitors the release of D-Ala during transpeptidation in coupled  
66 enzymatic reactions with D-amino acid oxidase, peroxidases and chromogenic or fluorogenic  
67 compounds (Frere *et al.*, 1976, Gutheil *et al.*, 2000, Catherwood *et al.*, 2020). Coupled assays  
68 are often limited in the choice of the reaction conditions, which in this case must be  
69 compatible with D-amino acid oxidase activity. Hence, each of the current assays has its  
70 limitations and most assays exclusively report on either the GTase or TPase activity, but not  
71 both activities at the same time.

72           Another major drawback of many of the current assays is that they include detergents  
73 and/or high concentration (up to 30%) of the organic solvent dimethyl sulfoxide (DMSO) to  
74 maintain the PG synthases in solution (Offant *et al.*, 2010, Biboy *et al.*, 2013, Huang *et al.*,  
75 2013, Lebar *et al.*, 2013, Qiao *et al.*, 2014, Egan *et al.*, 2015, Catherwood *et al.*, 2020).  
76 However, both detergents and DMSO have been shown to affect the activity and interactions  
77 of *E. coli* PBP1B (Egan & Vollmer, 2016). Importantly, a freely diffusing, detergent-  
78 solubilised membrane enzyme has a very different environment compared to the situation in  
79 the cell membrane where it contacts phospholipids and is confined in two dimensions  
80 (Gavutis *et al.*, 2006, Zhdanov & Höök, 2015). Here we sought to overcome the main  
81 limitations of current PG synthesis assays. We established the sensitive Förster Resonance  
82 Energy Transfer (FRET) detection technique for simultaneous monitoring of GTase and  
83 TPase reactions. The real-time assay reports on PG synthesis in phospholipid vesicles or  
84 planar lipid bilayers. We successfully applied this assay to several class A PBPs from  
85 pathogenic Gram-negative bacteria, demonstrating its robustness and potential use in  
86 screening assays to identify PBP inhibitors.

87

## 88 **RESULTS**

### 89 **Real time assay for detergent-solubilised *E. coli* PBP1B**

90 To develop a FRET-based real time assay for PG synthesis using fluorescently labelled lipid  
91 II, we prepared lysine-type lipid II versions with high quantum yield probes, Atto550 (as  
92 FRET donor) and Atto647n (as FRET acceptor), linked to position 3 (Figure 1 – figure  
93 supplement 1A-B) (Mohammadi *et al.*, 2014, Egan *et al.*, 2015). For assay development we  
94 used *E. coli* PBP1B (PBP1B<sup>Ec</sup>) (Egan *et al.*, 2015, Bertsche *et al.*, 2005, Biboy *et al.*, 2013)  
95 solubilized with Triton X-100 and a lipid-free version of its cognate outer membrane-

96 anchored lipoprotein activator LpoB (Typas *et al.*, 2010, Egan *et al.*, 2014, Egan *et al.*, 2018,  
97 Lupoli *et al.*, 2014, Catherwood *et al.*, 2020).

98 PBP1B<sup>Ec</sup> can utilize fluorescently labelled lipid II to polymerize long glycan chains  
99 only when unlabelled lipid II is also present in the reaction (van't Veer, 2016). We therefore  
100 included unlabelled *m*DAP-type lipid II into reactions of PBP1B<sup>Ec</sup> with lipid II-Atto550 and  
101 lipid II-Atto647n, with or without LpoB(sol) (Figure 1A). We monitored reactions by  
102 measuring fluorescence intensities in real time in a microplate reader for 60 min (Figure 1B,  
103 Figure 1 – figure supplement 1C). Consistent with fluorescence transfer occurring, the  
104 emission of the acceptor fluorophore at 665 nm ( $FI_{\text{acceptor}}$ ) increased while the emission of the  
105 donor fluorophore at 580 nm ( $FI_{\text{donor}}$ ) decreased, giving rise to an increase in the  
106  $FI_{\text{acceptor}}/FI_{\text{donor}}$  ratio (Figure 1 – figure supplement 1C). No FRET was observed in samples  
107 containing the GTase inhibitor moenomycin, which indirectly also inhibits TPase reactions  
108 (Bertsche *et al.*, 2005) (Figure 1 – figure supplement 1C). Without LpoB, FRET appeared  
109 after ~5 min and slowly increased until it plateaued after 50-60 min (Figure 1B). By contrast,  
110 reactions with LpoB(sol) showed an immediate and rapid increase in FRET which reached  
111 the plateau after 10-20 minutes, consistent with faster PG synthesis (Figure 1B, left panel).  
112 The presence of the TPase inhibitor ampicillin generally reduced the final FRET level by ~3-  
113 fold (Figure 1B, middle panel), indicating that the FRET is mainly a result of TPase  
114 reactions. As expected, ampicillin did not prevent the stimulation of PBP1B<sup>Ec</sup> by LpoB(sol)  
115 which accelerated the FRET increase by 10-20 times with or without ampicillin (Figure 1C),  
116 consistent with the previously reported stimulation of both, GTase and TPase activities  
117 (Typas *et al.*, 2010, Egan *et al.*, 2014, Egan *et al.*, 2018).

118 We also analysed the reaction products by SDS-PAGE combined with fluorescence  
119 scanning. This analysis confirmed the formation of PG chains containing both fluorophores,  
120 Atto550 and Atto647n and that ampicillin blocked the formation of cross-linked PG and  
121 moenomycin inhibited glycan strand formation (Figure 1D, Figure 1 – figure supplement  
122 1D).

123

#### 124 **Intra-chain versus inter-chain FRET**

125 Because ampicillin substantially reduced the FRET signal we hypothesized that FRET arises  
126 mainly between probe molecules residing on different glycan chains of a cross-linked PG  
127 product (Figure 1 – figure supplement 1A). To determine the contribution of intra-chain  
128 FRET, we performed reactions with only labelled lipid II (Figure 1B, right panel), where  
129 cross-linking is not possible. Without LpoB(sol), PBP1B<sup>Ec</sup> was unable to use lipid II-Atto550

130 and lipid II-Atto647n for polymerization (Figure 1B, D), confirming a previous study (van't  
131 Veer, 2016). In the presence of LpoB(sol), PBP1B<sup>Ec</sup> produced short, non-crosslinked  
132 individual PG chains (Figure 1D) that gave rise to a slow but large increase in FRET (Figure  
133 1B, right panel; Figure 1 – figure supplement 1C), indicating that lipid II polymerization  
134 reactions occurred. Our combined data also suggest that the total FRET signal emerges from  
135 two steps that have different rates. First, the formation of linear glycan chain causes initially a  
136 slow and moderate FRET increase and second, once peptide cross-linking reactions begin, the  
137 FRET increases fast and reaches a high level.

138 To confirm that the formation of peptide crosslinks is required to produce substantial  
139 FRET in the absence of LpoB, we analysed the PG synthesised by PBP1B<sup>Ec</sup> from  
140 radioactively labelled lipid II and the two fluorescent lipid II analogues (Figure 1E-G). We  
141 monitored the reaction at different time points by fluorescence spectroscopy (FRET  
142 measurements) and digested aliquots with the muramidase cellosyl before separating the  
143 resulting muropeptides by HPLC. The monomers and cross-linked muropeptide dimers were  
144 quantified by scintillation counting using an in-line radiation detector attached to the HPLC  
145 column (Figure 1F). FRET increased over time and correlated well with the formation of  
146 cross-linked muropeptide dimers, but not the rate of lipid II consumption (peak 2) (Figure  
147 1G). Overall, we conclude that the FRET assay is capable of reporting GTase activity alone,  
148 but the overall FRET signal is dominated by the TPase activity.

149

#### 150 **FRET assay to monitor PG synthesis in liposomes**

151 To establish the FRET assay for membrane-embedded PG synthases we reconstituted a  
152 version of PBP1B<sup>Ec</sup> with a single cysteine at the cytoplasmic N-terminus into liposomes  
153 prepared from *E. coli* polar lipids (EcPL) (Figure 2 – figure supplement 1A). The liposome-  
154 reconstituted PBP1B<sup>Ec</sup> became accessible to a sulfhydryl-reactive fluorescent probe only after  
155 disrupting the liposomes with detergent (Figure 2A), showing that virtually all PBP1B  
156 molecules were oriented with the N-terminus inside the liposomes. Next, we reconstituted  
157 unmodified PBP1B<sup>Ec</sup> and tested its activity by adding radioactive lipid II. In contrast to the  
158 detergent-solubilized enzyme, the liposome-reconstituted PBP1B<sup>Ec</sup> required the absence of  
159 NaCl from the reaction buffer for improved the activity (Figure 2 – figure supplement 1B-E),  
160 suggesting that ionic strength affects either the structure of PBP1B<sup>Ec</sup> in the membrane, the  
161 properties of EcPL liposomes or the delivery of lipid II into the liposomes.

162 We next aimed to adapt the FRET assay to study PG synthesis on liposomes (Figure  
163 2, Figure 2 – figure supplement 2). As PBP1B<sup>Ec</sup> did not accept Atto550- or Atto647-

164 derivatised lipid II for GTase reactions in the absence of unlabelled lipid II (Figure 1B), we  
165 reconstituted PBP1B<sup>Ec</sup> in liposomes along both Atto-labelled substrates and initiated the  
166 reaction by adding unlabelled lipid II (Figure 2B). PBP1B<sup>Ec</sup> reaction rates in liposomes were  
167 slower than in the presence of Triton X-100 and we noticed a lag time before FRET started to  
168 increase (Figure 2C, left panel). Ampicillin or moenomycin blocked the increase in FRET  
169 (Figure 2C, middle panel). For an unknown reason, the FRET signal with moenomycin was  
170 initially higher than without moenomycin and then decreased to initial values without  
171 moenomycin (Figure 2C, middle panel), independent of the class A PBP used (see below) but  
172 not in empty liposomes (Figure 2 – figure supplement 3). LpoB(sol) produced a ~10-fold  
173 increase in the initial slope (Figure 2D) and the resulting final FRET was higher (Figure 2C,  
174 left panel). Interestingly, in the presence of ampicillin and LpoB(sol), FRET increased  
175 rapidly at the start of reactions, but then decreased slowly, reaching a lower FRET value than  
176 in the presence of LpoB(sol) alone (without ampicillin) (Figure 2C, middle panel). The  
177 decrease in FRET in the presence of ampicillin suggests the spectroscopic properties of the  
178 incorporated probes change over time, presumably by moving them further away from the  
179 lipid end of the growing glycan chains. Liposomes without unlabelled lipid II produced a low  
180 FRET signal only in the presence of LpoB(sol) (Figure 2C, right panel). The analysis of the  
181 final products by SDS-PAGE confirmed that both Atto550 and Atto647n were incorporated  
182 into glycan chains or cross-linked peptidoglycan during the reaction in liposomes (Figure 2C,  
183 right side, Figure 2 – figure supplement 2B).

184 In summary, we established a FRET-based assay that allows to monitor the activity of  
185 membrane-reconstituted PBP1B in real time and showed that the FRET signal was sensitive  
186 to the presence of PG synthesis inhibitors (moenomycin and ampicillin).

187

### 188 **Activities of other membrane-bound class A PBPs**

189 To demonstrate the usefulness of the FRET assay to study class A PBPs of potential  
190 therapeutic interest, we next tested two PBP1B homologues from Gram-negative pathogens,  
191 *Acinetobacter baumannii* (PBP1B<sup>Ab</sup>) and *Pseudomonas aeruginosa* (PBP1B<sup>Pa</sup>). We set up  
192 reactions in the presence or absence of a soluble version of the lipoprotein activator  
193 LpoP<sup>Pa</sup>(sol) for PBP1B<sup>Pa</sup> (Greene *et al.*, 2018). There is currently no reported activator of  
194 PBP1B<sup>Ab</sup>, but next to the gene encoding PBP1B<sup>Ab</sup> we identified a hypothetical gene encoding  
195 a lipoprotein containing two tetratricopeptide repeats (Uniprot code D0C5L6) (Figure 2 –  
196 figure supplement 4) which we subsequently found to activate PBP1B<sup>Ab</sup> (see below, Figure 2  
197 – figure supplement 5). We named this protein LpoP<sup>Ab</sup> and purified a version without its lipid

198 anchor, called LpoP<sup>Ab</sup>(sol). We were able to monitor PG synthesis activity by FRET for both  
199 PBPs in the presence or absence of their (hypothetical) activators, using the Triton X-100-  
200 solubilized (Figure 2 – figure supplements 6 and 7) or liposome-reconstituted proteins  
201 (Figure 2E-H, Figure 2 – figure supplement 2C-D). Our experiments revealed differences in  
202 the activities and effect of activators between both PBP1B-homologues which we discuss in  
203 the following paragraphs.

204 PBP1B<sup>Ab</sup> showed GTase activity in the presence of Triton X-100 (Figure 2 – figure  
205 supplement 5A) and was stimulated ~3.3-fold by LpoP<sup>Ab</sup>(sol) (Figure 2 – figure supplement  
206 5B); LpoP<sup>Ab</sup>(sol) also accelerated the consumption of lipid II-Atto550 and glycan chain  
207 polymerization (Figure 2 – figure supplement 5C). We measured a low activity of the  
208 detergent-solubilised enzyme in the FRET assay (Figure 2 – figure supplement 6A) and poor  
209 production of cross-linked PG (Figure 2 – figure supplement 6C), unlike in the case of the  
210 other PBPs. However, the liposome-reconstituted PBP1B<sup>Ab</sup> displayed a higher TPase activity  
211 than the detergent-solubilised enzyme (compare gels on Figure 2E, right panel and Figure 2 –  
212 figure supplement 6C). In addition, the final FRET signal was substantially higher in  
213 liposomes than in detergents (Figure 2E, Figure 2 – figure supplement 6A). Moenomycin  
214 completely blocked FRET development, whilst ampicillin had a negligible effect on the final  
215 FRET levels in detergents and only a small effect in liposomes (~1.2-fold reduction),  
216 indicating that intra-chain FRET is the major contributor to FRET (Figure 2E; Figure 2 –  
217 figure supplement 6A). LpoP<sup>Ab</sup>(sol) stimulated PBP1B<sup>Ab</sup>, with a higher effect in detergents  
218 (5.1-fold increase) than liposomes (~2.5-fold increase) (Figure 2E, F; Figure 2 – figure  
219 supplement 6A-B).

220 PBP1B<sup>Pa</sup> displayed robust TPase activity in detergents and liposomes (Figure 2G,  
221 right panel; Figure 2 – figure supplement 7C) and ampicillin reduced the final FRET signal  
222 by ~1.8-fold in Triton X-100 and by ~1.5-fold in liposomes, indicating a substantial  
223 contribution of inter-chain FRET to the FRET signal (Figure 2G, Figure 2 – figure  
224 supplement 7A). The addition of LpoP<sup>Pa</sup>(sol) resulted in an increase in the final FRET by  
225 ~2.2-fold in the membrane and by ~2.1-fold in detergents (Figure 2G, Figure 2 – figure  
226 supplement 7A), accelerated initial slopes by ~4.2-fold in the membrane and by ~11.5-fold in  
227 detergents (Figure 2H, Figure 2 – figure supplement 7B); lipid II consumption was increased  
228 under both conditions (Figure 2G, right panel; Figure 2 – figure supplement 7C). Overall,  
229 these results indicate that LpoP<sup>Pa</sup>(sol) stimulates both GTase and TPase activities in  
230 agreement with a recent report (Caveney *et al.*, 2020).

231



## 232 **PG synthesis on supported lipid bilayers**

233 As we were able to successfully reconstitute active class A PBPs in membranes and monitor  
234 their activity in real time, we next aimed to characterise the behaviour of these enzymes in  
235 the membrane in more detail by reconstituting them on supported lipid bilayers (SLBs). SLBs  
236 are phospholipid bilayers formed on top of a solid support, usually a glass surface and they  
237 allow for studying the spatial organization of transmembrane proteins and their diffusion  
238 along the membrane by fluorescence microscopy at high spatio-temporal resolution.

239 We optimized the reconstitution of PBP1B<sup>Ec</sup> in SLBs formed with EcPL and used the  
240 optimized buffer conditions for activity assays on liposomes. To support lateral diffusion and  
241 also improve stability of the proteins incorporated into SLBs, we employed glass surfaces  
242 coated with polyethylene glycol (PEG) end-functionalized with a short fatty acid (Roder *et*  
243 *al.*, 2011) to anchor the EcPL bilayer (Figure 3A). We noticed a decrease in membrane  
244 diffusivity and homogeneity at a high surface density of PBP1B<sup>Ec</sup> (Figure 3 – figure  
245 supplement 1). To prevent disturbing the SLB structure by the inserted protein we reduced  
246 the density of PBP1B<sup>Ec</sup> on SLBs from  $\sim 10^{-3}$  mol protein/mol lipid in liposomes to a range of  
247  $10^{-6}$  to  $10^{-5}$  mol protein/mol lipid. Using a fluorescently-labelled version of PBP1B<sup>Ec</sup>  
248 reconstituted in SLBs, we were able to track the diffusion of single PBP1B molecules in the  
249 plane of lipid membrane in the presence or absence of substrate lipid II by TIRF microscopy  
250 (Figure 3B, 3D, Movie 1). PBP1B<sup>Ec</sup> diffused on these supported bilayers with an average  
251  $D_{\text{coef}}$  of  $0.23 \pm 0.06 \mu\text{m}^2/\text{s}$ . Addition of lipid II slowed down PBP1B<sup>Ec</sup> diffusion (Figure 3C),  
252 resulting in a lower average  $D_{\text{coef}}$  of  $0.10 \pm 0.06 \mu\text{m}^2/\text{s}$ . Upon addition of lipid II, we could not  
253 detect a prolonged confined motion within particle tracks (Figure 3D), however the average  
254 length of displacements was reduced (Figure 3E). Thus we successfully reconstituted  
255 diffusing PBP1B<sup>Ec</sup> in SLBs and we observed that lipid II-binding slowed down the diffusion  
256 of the synthase.

257 Next we wanted to confirm that PBP1B<sup>Ec</sup> remained active to produce planar bilayer-  
258 attached PG. We incubated SLBs containing PBP1B<sup>Ec</sup> with radioactive lipid II and digested  
259 any possible PG produced with a muramidase and analysed the digested material by HPLC.  
260 Due to the low density and amount of PBP1B<sup>Ec</sup> on each SLB chamber we expected a small  
261 amount of PG product; hence, we included LpoB(sol) to boost the activity of PBP1B<sup>Ec</sup>.  
262 Under these conditions about 12% of the added radiolabelled lipid II was incorporated into  
263 PG after an overnight incubation (Figure 3 – figure supplement 2A). However, products of  
264 both the GTase and TPase activities of PBP1B<sup>Ec</sup> were detected and these products were  
265 absent in the presence of moenomycin (Figure 3 – figure supplement 2B). After overnight PG

266 synthesis reactions with radioactive lipid II, about 32% of the radioactivity remained in the  
267 membrane fraction after washing (PG products and unused lipid II) and 68% was in the  
268 supernatant. The analysis of the membrane and wash fractions by HPLC (Figure 3 – figure  
269 supplement 2C-D) revealed that SLB-reconstituted PBP1B<sup>Ec</sup> produced crosslinked PG while,  
270 importantly, the wash fraction contained no PG products, confirming that the PG synthesis  
271 occurred on the SLBs and this PG remained attached to the bilayer. The fraction of  
272 membrane-attached radioactivity was almost the same (33%) when PBP1B<sup>Ec</sup> was not present  
273 in the bilayer, indicating that PBP1B<sup>Ec</sup> did not affect lipid II-binding to the bilayer.

274

### 275 **FRET assay on supported bilayers**

276 Next, we adapted the FRET assay to SLBs and TIRF microscopy taking advantage of the  
277 photostability and brightness of the Atto550 and Atto647n probes. Our aim was to visualize  
278 PG synthesis by class A PBPs at high resolution as a first step towards understanding PG  
279 synthesis at a single molecule level. We used a similar approach as for liposomes, where both  
280 Atto550- and Atto647n-labelled lipid II were co-reconstituted with PBP1B<sup>Ec</sup> on supported  
281 lipid bilayers and PG synthesis was triggered by the addition of unlabelled lipid II (Figure  
282 2A). To measure any change in FRET due to PG synthesis, we took advantage of the fact that  
283 upon photobleaching of the acceptor probe in a FRET pair, the emitted fluorescence intensity  
284 of the donor increases as absorbed energy cannot be quenched by a nearby acceptor (Verveer,  
285 2005, Loose *et al.*, 2011). Indeed, we detected an increase in lipid II-Atto550 fluorescence  
286 intensity upon photobleaching of the Atto647n probe after the addition unlabelled lipid II and  
287 LpoB(sol), indicating the presence of FRET (Figure 4A, Figure 4 – figure supplement 1A).  
288 When we bleached the acceptor at different time points of the reaction, we found the FRET  
289 signal to increase after a lag phase of ~8 min. Importantly, there was no FRET increase in the  
290 presence of ampicillin (Figure 4B, Figure 4 – figure supplement 1A, Movie 2) or when a  
291 GTase-defective PBP1B<sup>Ec</sup> version (E233Q) was used (Figure 4C). In addition, the FRET  
292 signal was abolished when the muramidase cellosyl was added after the PG synthesis reaction  
293 (Figure 4C). These results imply that the FRET signal detected by microscopy is primarily  
294 due to the transpeptidase activity of PBP1B<sup>Ec</sup>, in agreement with the results obtained on  
295 liposomes (Figure 2C).

296

### 297 **PG synthesised on supported lipid bilayers**

298 As our experiments confirmed that the PG synthesized by PBP1B<sup>Ec</sup> on SLBs remained  
299 attached to the bilayer, we next analysed the lateral diffusion of lipid II-Atto647n and its

300 products during PG synthesis reactions. We first analysed the recovery of fluorescence  
301 intensity after photobleaching to monitor the diffusion of lipid II-Atto647n during PG  
302 synthesis (Figure 4D). Only when crosslinking was permitted (absence of ampicillin), the  
303 diffusion coefficient of lipid II-Atto647n decreased 2 to 3-fold in a time-dependent manner.  
304 The time needed to reach the minimum diffusivity value (~10 min) was similar to the lag  
305 detected in the increase of FRET efficiency (Figure 4B). The fraction of immobile lipid II-  
306 Atto647n did not change significantly in the presence or absence of ampicillin ( $13\% \pm 2\%$  or  
307  $18\% \pm 6\%$ , respectively,  $p$ -value = 0.15) (Figure 4E), indicating that the crosslinked PG was  
308 still mobile under these conditions, but diffused more slowly. We also compared the diffusion  
309 of lipid II-Atto647n during the PG synthesis reaction with that of an AlexaFluor 488-labelled  
310 membrane-anchored peptide in the presence or absence of ampicillin (Figure 4F, Figure 4 –  
311 figure supplement 2B). The inhibition of TPase by ampicillin only affected the diffusivity of  
312 lipid II ( $2.9 \pm 0.4 \mu\text{m}^2/\text{s}$  with ampicillin and  $0.67 \pm 0.1 \mu\text{m}^2/\text{s}$  without), while that of the lipid  
313 probe remained unchanged ( $1.6 \pm 0.65 \mu\text{m}^2/\text{s}$  with ampicillin and  $1.94 \pm 0.62 \mu\text{m}^2/\text{s}$  without).  
314 This shows that the membrane fluidity was not altered by the PG synthesis reaction and  
315 therefore was not the cause of the change in lipid II diffusivity upon transpeptidation. As the  
316 immobile fraction of labelled lipid II did not increase after PG synthesis and the diffusion  
317 was reduced only 2 to 3-fold, we concluded that lipid II-Atto647n was incorporated into  
318 small groups of crosslinked glycan chains which can still diffuse on the bilayer.

319 In summary, we report the incorporation of active PBP1B<sup>Ec</sup> into supported lipid  
320 bilayers, where we could track a decrease in the diffusion of the protein and its substrate  
321 during PG synthesis reactions. Using this system we detected an increase in FRET upon  
322 initiation of PG synthesis, only occurring when transpeptidation was not inhibited.

323

## 324 **DISCUSSION**

325 Even though class A PBPs are membrane proteins and PG precursor lipid II is embedded in  
326 the bilayer, few studies have provided information about the activity of these important  
327 enzymes in a membrane environment. Here we developed a new assay that reports on PG  
328 synthesis by these enzymes in detergents, on liposomes or on supported lipid bilayers.

329

### 330 **Intra-chain vs inter-chain FRET**

331 For all PBPs and conditions tested, FRET increased when only the GTase domain was active  
332 (i.e. when FRET occurred between probes incorporated along the same strand), but the FRET  
333 signal was always higher when transpeptidase was active (Figures 1, 2 and Figure 2 – figure

334 supplements 6 and 7). For detergent-solubilised PBP1B<sup>Ec</sup>, the FRET curve closely followed  
335 the rate of the production of cross-linked PG as determined by HPLC analysis of the products  
336 (Figure 1E-G). These results suggest that inter-chain FRET (arising from both fluorophores  
337 present on different, adjacent glycan chains) was a main component of the total FRET signal.  
338 Why is this the case? FRET depends on the distance and orientation of the two probes. It  
339 might be sterically unfavourable that two large Atto550 and Atto647n containing lipid II  
340 molecules simultaneously occupy the donor and acceptor sites in the GTase domain (van't  
341 Veer, 2016), preventing the incorporation of probes (and high FRET) at successive subunits  
342 on a single glycan chain. Indeed, for all PBPs tested either in detergents or liposomes, the  
343 incorporation of labelled lipid II into glycan chains was more efficient when unlabelled lipid  
344 II was present and for most enzymes an activator was required to polymerize glycan chains  
345 using labelled lipid II in the absence of unlabelled lipid II. We thus hypothesize that the  
346 TPase activity brings glycan chains to close proximity, reducing the distance between probes  
347 sufficiently to produce high levels of FRET (Figure 5).

348

#### 349 **Coupled reactions in class A PBs**

350 An elegant recent report (Catherwood *et al.*, 2020) described the use of a coupled D-Ala  
351 release assay to determine the kinetic parameters of the TPase activity of PBP1B<sup>Ec</sup> against  
352 different substrates and this study also confirmed the previously reported activation of the  
353 TPase of PBP1B by LpoB in the presence of detergents (Egan *et al.*, 2014, Egan *et al.*, 2018,  
354 Lupoli *et al.*, 2014). The authors of the recent report (Catherwood *et al.*, 2020) discussed that  
355 the LpoB-mediated TPase activation explains the essentiality of LpoB for PBP1B function in  
356 the cell. However, this view ignores previously published data demonstrating that the  
357 essentiality of LpoB can be readily explained by its primary effect, the >10-fold stimulation  
358 of PBP1B's GTase (Egan *et al.*, 2014). TPase reactions follow and depend on ongoing GTase  
359 reactions (Bertsche *et al.*, 2005). Interestingly, LpoB-activated PBP1B produces a hyper-  
360 crosslinked PG (Typas *et al.*, 2010, Egan *et al.*, 2018), suggesting that LpoB stimulates the  
361 TPase more than the GTase. In the cell, a protein associated with the Tol system, CpoB,  
362 modulates this hyper-stimulation of the TPase when coordinating outer membrane  
363 constriction and PG synthesis during cell division (Gray *et al.*, 2015). The observed  
364 stimulation of both reactions by LpoB is consistent with conformational changes in the  
365 regulatory UB2H domain in PBP1B that occur upon LpoB binding and that affect amino acid  
366 residues pointing towards both domains (Egan *et al.*, 2018). A limitation of the recent kinetic  
367 study is that authors used assay conditions (e.g. very low enzyme concentration) at which

368 PBP1B<sup>Ec</sup> is virtually inactive without an activator (Catherwood *et al.*, 2020) as demonstrated  
369 previously (Pazos *et al.*, 2018, Muller *et al.*, 2007), thus the study likely substantially  
370 overestimated the extent of TPase activation by LpoB.

371 *P. aeruginosa* uses a structurally different lipoprotein activator, LpoP, to stimulate its  
372 PBP1B (Greene *et al.*, 2018). Here, we identified an LpoP homologue in *A. baumannii* and  
373 showed that both, LpoP<sup>Ab</sup> and LpoP<sup>Pa</sup> significantly activated their cognate PBP1B.  
374 Interestingly, LpoP<sup>Ab</sup> stimulated the GTase and not TPase of PBP1B<sup>Ab</sup> while LpoP<sup>Pa</sup>  
375 stimulated both activities in PBP1B<sup>Pa</sup> which may illustrate how different species have tailored  
376 their activators to their specific needs. Importantly, PBP1B<sup>Ab</sup> TPase activity was higher in  
377 liposomes than in detergents, which serves as a reminder that detergents are not always  
378 neutral solubilising agents and they can affect the activity of membrane proteins.

379

### 380 **Towards single-molecule PG synthesis**

381 We also adapted the FRET assay to supported lipid bilayers and super resolution microscopy  
382 to study how PBP1B<sup>Ec</sup> polymerizes PG on SLBs (Figure 4). As with the liposome assays, we  
383 detected an increase in FRET signal upon triggering PG synthesis that correlated with  
384 transpeptidation. Importantly we could follow the diffusion of the reaction products, which  
385 indicates that PBP1B<sup>Ec</sup> does not completely cover the surfaces with a layer of PG but instead  
386 produced smaller patches of cross-linked glycan chains. We attribute this to the fact that  
387 PBP1B<sup>Ec</sup> was reconstituted at a very low density in order to ensure the homogeneity and  
388 stability of the SLBs. Remarkably, we detected a reduction of PBP1B<sup>Ec</sup> diffusivity in the  
389 presence of lipid II (Figure 3). Previous *in vivo* single-molecule tracking of fluorescent-  
390 protein tagged class A PBPs reported the presence of two populations of molecules, a fast  
391 diffusing one and an almost immobile one with a near-zero diffusing rate which was assumed  
392 to be the active population (Cho *et al.*, 2016, Lee *et al.*, 2016, Vigouroux *et al.*, 2020). Our  
393 result supports this interpretation, although more experiments are required to further explore  
394 this point.

395 Several real time methods to study PG synthesis *in vitro* are described in the  
396 literature. However, most of these report on either the GTase or TPase reaction, but not both  
397 at the same time, and most available methods are not applicable to the membrane. The  
398 scintillation proximity assay by Kumar *et al.* reports on PG production in a membrane  
399 environment and in real time, but it is rather crude in that it uses membrane extract instead of  
400 purified protein and relies on the presence of lipid II synthesizing enzymes present in the  
401 extract (Kumar *et al.*, 2014). Moreover, it uses radioactivity detection and is not amenable

402 to microscopy, in contrast to methods based on fluorescently-labelled substrates. An  
403 important advantage of our new assay over other real-time TPase assays is that it uses natural  
404 substrates for transpeptidation, i.e. nascent glycan strands, instead of mimics of the  
405 pentapeptide, and its ability to measure the activities in a natural lipid environment.

406 Our new FRET assay can potentially be adopted to assay PG synthases in the  
407 presence of interacting proteins, for example monofunctional class B PBPs in the presence of  
408 monofunctional GTases (cognate SEDS proteins or Mgt proteins) or interacting class A PBPs  
409 (Meeske *et al.*, 2016, Bertsche *et al.*, 2006, Sjodt *et al.*, 2020, Derouaux *et al.*, 2008, Banzhaf  
410 *et al.*, 2012, Sjodt *et al.*, 2018). In addition, our assay has the potential to be adopted to high  
411 throughput screening for new antimicrobials.

412

## 413 **MATERIALS AND METHODS**

### 414 **Chemicals**

415 [<sup>14</sup>C]GlcNAc-labelled lipid II and the lysine or *m*DAP forms of lipid II were prepared as  
416 published (Breukink *et al.*, 2003, Bertsche *et al.*, 2005). Lipid II-Atto550 and Lipid II-  
417 Atto647n were prepared from the lysine form of lipid II, and Atto550-alkyne or Atto647n-  
418 alkyne (Atto tec, Germany) as previously described (Mohammadi *et al.*, 2014, Egan *et al.*,  
419 2015). Polar lipid extract from *E. coli* (EcPL), 1,2-dipalmitoleoyl-*sn*-glycero-3-  
420 phosphocholine (DOPC), 1-palmitoyl-2-oleoyl-*sn*-glycero-3-phospho-(1'-*rac*-glycerol)  
421 (POPG) and tetraoleoyl cardiolipin (TOCL) were obtained from Avanti Polar Lipids (USA).  
422 Lipids were resuspended in chloroform:methanol (2:1) at a concentration of 20 g/L, aliquoted  
423 and stored at -20°C. Triton X-100, ampicillin, phenylmethylsulfonyl fluoride (PMSF),  
424 protease inhibitor cocktail (PIC) and β-mercaptoethanol were from Merck. n-dodecyl-beta-D-  
425 maltopyranoside (DDM) was purchased from Anatrace (USA). Moenomycin was purchased  
426 from Hoechst, Germany. All other chemicals were from Merck.

427

### 428 **Cloning**

429 *Construction of overexpression vector pKPWV1B* – The plasmid pKPWV1B was constructed  
430 for overexpression of full-length *A. baumannii* PBP1B (PBP1B<sup>Ab</sup>: aa 1-798) with a cleavable  
431 N-terminal oligo-histidine tag (His<sub>6</sub> tag). Therefore, the gene *mrcB* was amplified using the  
432 Phusion high fidelity DNA polymerase and the oligonucleotides PBP1B.Acineto-NdeI\_f and  
433 PBP1B.Acineto-BamHI\_r and genomic DNA of *A. baumannii* 19606 (ATCC) as template.  
434 The resulting PCR fragment and the Plasmid DNA of the overexpression vector pET28a(+)

435 (Novagen) were digested with *NdeI* and *BamHI*, ligated and transformed into chemical  
436 competent *E. coli* DH5 $\alpha$  cells with kanamycin selection. Plasmid DNA of transformants was  
437 isolated and send for sequencing using following oligonucleotides:  
438 Seq1\_rev\_PBP1B\_Acineto, Seq2\_fwd\_PBP1B\_Acineto, Seq3\_fwd\_PBP1B\_Acineto,  
439 Seq4\_fwd\_PBP1B\_Acineto.

440 *Construction of overexpression vector pKPWVLpoP* – The sequence of the hypothetical  
441 PBP1B activator of *Acinetobacter baumannii* 19606 (LpoP<sup>Ab</sup>: NCBI reference number:  
442 WP\_000913437.1) contains a TPR fold and was found by blast analysis through its homology  
443 to *Pseudomonas aeruginosa* LpoP (30% identity). The plasmid pKPWVLpoP was purchased  
444 from the company GenScript. The gene was synthesized without the first 51 nucleotides  
445 (encoding the 17 amino acids of the signal peptide) and with codon optimization for  
446 overexpression in *Escherichia coli*. The codon optimized gene was subcloned in the  
447 overexpression vector pET28a(+) using the cloning sites *NdeI* and *BamHI* enabling the  
448 overexpression of the protein with an N-terminal oligo-histidine tag.

449 *MGC-<sup>64</sup>PBP1B-his C777S/C795S* – This fusion protein contains PBP1B with the substitution  
450 of the N-terminal cytoplasmic tail for residues MGC and the addition of a hexahistidine tag at  
451 the C-terminus. To obtain this construct, the regions coding for aminoacids 64 to 844 of  
452 PBP1B were amplified from genomic DNA using oligonucleotides PBP1B-MGC-F and  
453 PBP1B-CtermH-R. The resulting product was cloned into pET28a+ vector (EMD  
454 Biosciences) after digestion with *NcoI* and *XhoI*. C777S and C795S mutations were  
455 introduced using the QuikChange Lightning mutagenesis kit (Agilent) using oligonucleotide  
456 primers C777S-D, C777S-C, C795S-D and C795S-C The resulting plasmid was called  
457 pMGCPBP1BCS1CS2.

458

#### 459 **Purification and labelling of proteins**

460 The following proteins were purified following published protocols: PBP1B<sup>Ec</sup>  
461 (Bertsche *et al.*, 2006), LpoB(sol) (Egan *et al.*, 2014), PBP1B<sup>Pa</sup> (Caveney *et al.*, 2020),  
462 LpoP<sup>Pa</sup>(sol) (Caveney *et al.*, 2020). All chromatographic steps were performed using an  
463 AKTA PrimePlus system (GE Healthcare).

464 *E. coli PBP1B* – The protein was expressed as a fusion with an N-terminal hexahistidine tag  
465 in *E. coli* BL21(DE3) pDML924 grown in 4 L of autoinduction medium (LB medium  
466 supplemented with 0.5% glycerol, 0.05% glucose, and 0.2%  $\alpha$ -lactose) containing kanamycin  
467 at 30 °C for ~16h. Cells were harvested by centrifugation (10,000  $\times$  g, 15 min, 4 °C) and the  
468 pellet resuspended in 80 mL of buffer I (25 mM Tris-HCl, 1 M NaCl, 1 mM EGTA, 10%

469 glycerol, pH 7.5) supplemented with 1× protease inhibitor cocktail (PIC, Sigma-Aldrich), 100  
470 μM phenylmethylsulfonyl fluoride (PMSF, Sigma-Aldrich) and DNase I. After disruption by  
471 sonication on ice, membrane fraction was pelleted by centrifugation (130,000 × g for 1 h at  
472 4 °C) and resuspended in buffer II (25 mM Tris-HCl, 1 M NaCl, 10% glycerol, 2% Triton X-  
473 100, pH 7.5) by stirring at 4 °C for 24 h. Extracted membranes were separated from insoluble  
474 debris by centrifugation (130,000 × g for 1 h at 4 °C) and incubated for 2h with 4 mL of Ni<sup>2+</sup>-  
475 NTA beads (Novagen) equilibrated in buffer III (25 mM Tris-HCl, 1 M NaCl, 20 mM  
476 imidazole, 10% glycerol, pH 7.5). Beads were washed 10 times with 10 mL of buffer III and  
477 the protein was eluted with 3 mL buffer IV (25 mM Tris-HCl, 0.5 M NaCl, 20 mM imidazole,  
478 10% glycerol, pH 7.5). His-PBP1B containing fractions were pooled and treated with 2 U/mL  
479 of thrombin (Novagen) for 20 h at 4 °C during dialysis against dialysis buffer I (25 mM Tris-  
480 HCl, 0.5 M NaCl, 10% glycerol, pH 7.5). Protein was then dialysed in preparation for ion  
481 exchange chromatography, first against dialysis buffer II (20 mM sodium acetate, 0.5 M  
482 NaCl, 10% glycerol, pH 5.0); then against dialysis buffer II with 300 mM NaCl; and finally  
483 against dialysis buffer II with 100 mM NaCl. Finally, the sample was applied to a 1 mL  
484 HiTrap SP column (GE Healthcare) equilibrated in buffer A (20 mM sodium acetate, 100 mM  
485 NaCl, 10% glycerol, 0.05% reduced Triton X-100, pH 5.0). The protein was eluted with a  
486 gradient from 0 to 100% buffer B (as A, with 2 M NaCl) over 14 mL PBP1B-containing  
487 fractions were pooled and dialysed against storage buffer (20 mM sodium acetate, 500 mM  
488 NaCl, 10% glycerol, pH 5.0) and stored at -80 °C.

489 *A. baumannii* 19606 PBP1B – The protein was expressed in *E. coli* BL21 (DE3) freshly  
490 transformed with plasmid pKPWV1B using the same protocol as PBP1B<sup>Ec</sup>. Cells were  
491 harvested by centrifugation (6,200 × g for 15 min at 4 °C) and resuspended in 120 mL of  
492 PBP1B<sup>Ab</sup> buffer I (20 mM NaOH/H<sub>3</sub>PO<sub>4</sub>, 1 M NaCl, 1 mM EGTA, pH 6.0) supplemented  
493 with DNase I, PIC (1:1,000 dilution) and 100 μM PMSF. After disruption by sonication on  
494 ice, the membrane fraction was pelleted by centrifugation (130,000 × g for 1 h at 4 °C) and  
495 resuspended in PBP1B<sup>Ab</sup> extraction buffer (20 mM NaOH/H<sub>3</sub>PO<sub>4</sub>, 1 M NaCl, 10% glycerol,  
496 2% Triton X-100, pH 6.0) supplemented with PIC and PMSF by stirring at 4 °C for 16 h.  
497 Extracted membranes were separated from insoluble debris by centrifugation (130,000 × g for  
498 1 h at 4 °C) and incubated with 4 mL of Ni<sup>2+</sup>-NTA beads equilibrated in PBP1B<sup>Ab</sup> extraction  
499 buffer containing 15 mM imidazole. Beads were washed 10 times with 10 mL of PBP1B<sup>Ab</sup>  
500 wash buffer (20 mM NaOH/H<sub>3</sub>PO<sub>4</sub>, 10% Glycerol, 0.2% Triton X-100, 1M NaCl, 15 mM  
501 Imidazole, pH 6.0) and the protein was eluted with 3 mL buffer IV PBP1B<sup>Ab</sup> elution buffer



502 (20 mM NaOH/H<sub>3</sub>PO<sub>4</sub>, 10% Glycerol, 0.2% Triton X-100, 1 M NaCl, 400 mM Imidazole,  
503 pH 6.0).

504 PBP1B<sup>Ab</sup>-containing fractions were pooled and dialyzed in preparation for ion exchange  
505 chromatography, first against PBP1B<sup>Ab</sup> dialysis buffer I (20 mM sodium acetate, 1 M NaCl,  
506 10% glycerol, pH 5.0), then against PBP1B<sup>Ab</sup> dialysis buffer II (20 mM sodium acetate, 300  
507 mM NaCl, 10% glycerol, pH 5.0) and finally against PBP1B<sup>Ab</sup> dialysis buffer III (10 mM  
508 sodium acetate, 100 mM NaCl, 10% glycerol, pH 5.0). The sample was centrifuged for 1 h at  
509 130,000 × g and 4 °C and the supernatant was applied to a 5 mL HiTrap SP HP column  
510 equilibrated in PBP1B<sup>Ab</sup> buffer A (20 mM sodium acetate, 100 mM NaCl, 10% glycerol,  
511 0.2% Triton X-100, pH 5.0). The protein was eluted from 0 to 100% PBP1B<sup>Ab</sup> buffer B (20  
512 mM sodium acetate, 2 M NaCl, 10% glycerol, 0.2% Triton X-100, pH 5.0) over 70 mL.  
513 PBP1B<sup>Ab</sup>-containing fractions were pooled and dialysed against PBP1B<sup>Ab</sup> storage buffer (10  
514 mM sodium acetate, 500 mM NaCl, 0.2% Triton X-100, 20% glycerol, pH 5.0) and stored at  
515 -80 °C.

516 *P. aeruginosa* PBP1B – The protein was expressed on *E. coli* BL21(DE3) freshly  
517 transformed with plasmid pAJFE52 which encodes PBP1BP<sub>a</sub> as a fusion with an N-terminal  
518 hexahistidine tag in *E. coli* BL21(DE3). Cells were grown in 4 L of LB at 30 °C and  
519 expression was induced for 3 h with 1 mM IPTG when the culture reached an OD<sub>578</sub> of 0.6.  
520 PBP1B<sup>Pa</sup> was extracted and purified using the same protocol as for *E. coli* PBP1B with the  
521 exception that only 2 mL of Ni<sup>2+</sup> beads were used.

522 MGC-<sup>64</sup>PBP1B-his C777S/C795S – This protein was expressed in *E. coli* BL21(DE3) freshly  
523 transformed with plasmid pMGCPBP1BCS1CS2 and subsequently purified using the same  
524 protocol as for the WT protein, except for the addition of 1 mM TCEP to all purification  
525 buffers. The protein was labelled with Dy647-maleimide probe (Dyomics, Germany)  
526 following instructions from the manufacturer. Briefly, 10.2 μM protein was incubated with  
527 100 μM probe and 0.5 mM TCEP for ~20 h at 4 °C and free probe was removed by desalting  
528 using a 5 mL HiTrap desalting column (GE Healthcare).

529 *LpoB(sol)* – The protein was expressed on *E. coli* BL21(DE3) transformed with pET28His-  
530 *LpoB(sol)*. Cells were grown in 1.5 L of LB plus kanamycin at 30 °C to an OD<sub>578</sub> of 0.4–0.6  
531 and expression was induced with 1 mM of IPTG for 3 h at 30 °C. Cells were pelleted and  
532 resuspended in buffer I (25 mM Tris-HCl, 10 mM MgCl<sub>2</sub>, 500 mM NaCl, 20 mM imidazole,  
533 10% glycerol, pH 7.5) plus DNase, PIC and PMSF. Cells were disrupted by sonication on ice  
534 and centrifuged (130,000 × g, 1 h, 4 °C) to remove debris. The supernatant was applied to a  
535 5 mL HisTrap HP column (GE Healthcare) equilibrated in buffer I. After washing with buffer

536 I, the protein was eluted with a stepwise gradient with buffer II (25 mM Tris-HCl, 10 mM  
537 MgCl<sub>2</sub>, 500 mM NaCl, 400 mM imidazole, 10% glycerol, pH 7.5). Fractions containing the  
538 protein were pooled and the His-tag was removed by addition of 2 U/mL of thrombin while  
539 dialysing against buffer IEX-A (20 mM Tris-HCl, 1000 mM NaCl, 10% glycerol, pH 8.3).  
540 Digested protein was applied to a 5 mL HiTrap Q HP column (GE Healthcare) at 0.5 mL/min.  
541 LpoB(sol) was collected in the flow through, concentrated and applied to size exclusion on a  
542 Superdex200 HiLoad 16/600 column (GE Healthcare) at 1 mL/min in a buffer containing  
543 25 mM HEPES-NaOH, 1 M NaCl, 10% glycerol at pH 7.5. Finally, the protein was dialysed  
544 against storage buffer (25 mM HEPES-NaOH, 200 mM NaCl, 10% glycerol at pH 7.5) and  
545 stored at -80 °C.

546 *A. baumannii* 19606 *LpoP(sol)* – The protein was expressed on *E. coli* BL21(DE3)  
547 transformed with plasmid pKPWVLpoP. Cells were grown over night at 30 °C in 4 L of  
548 autoinduction medium. Cells were pelleted by centrifugation (6,200 × *g* for 15 min at 4 °C)  
549 and resuspended in 80 mL of buffer I (25 mM Tris/HCl, 10 mM MgCl<sub>2</sub>, 1 M NaCl, 20 mM  
550 Imidazole, pH 7.5) supplemented with DNase I, PIC (1:1,000 dilution) and 100 μM PMSF.  
551 Cells were disrupted by sonication on ice and centrifuged (130,000 × *g* for 1 h at and 4 °C) to  
552 removed debris. The supernatant was incubated for 1h with 6 mL Ni-NTA beads  
553 preequilibrated in buffer I at 4 °C with gentle stirring. The resin was split in 2 columns, each  
554 washed 10 times with 5 mL wash buffer (25 mM Tris/HCl, 10 mM MgCl<sub>2</sub>, 1 M NaCl, 20  
555 mM Imidazole, pH 7.5) and the protein was eluted 7 times with 2 mL of elution buffer (25  
556 mM Tris/HCl, 10 mM MgCl<sub>2</sub>, 1 M NaCl, 400 mM Imidazole, pH 7.5). The best fractions  
557 according to SDS-PAGE analysis were pooled and dialyzed stepwise against increasing  
558 percentage of dialysis buffer I (25 mM HEPES/NaOH, 10 mM MgCl<sub>2</sub>, 200 mM NaCl, 10%  
559 glycerol, pH 7.5). Thrombin (9 units) was added to the protein to cleave the N-terminal His<sub>6</sub>  
560 tag over night at 4 °C. The successful cleavage of the N-terminal His<sub>6</sub> tag was confirmed by  
561 SDS-PAGE. The protein was diluted 2× with 25 mM HEPES/NaOH, 10 mM MgCl<sub>2</sub>, 10%  
562 glycerol, pH 7.5 to reduce the amount of NaCl down to 100 mM. The protein was applied to  
563 a 5 mL HiTrap SP HP column and washed with buffer A (25 mM HEPES/NaOH, 10 mM  
564 MgCl<sub>2</sub>, 100 mM NaCl, 10% glycerol, pH 7.5). The protein was then eluted with a gradient of  
565 100 mM to 1 M NaCl over 50 mL at 1 mL/min using increasing percentage of buffer B (25  
566 mM HEPES/NaOH, 10 mM MgCl<sub>2</sub>, 1 M NaCl, 10% glycerol, pH 7.5). Fractions were  
567 collected and analysed by SDS-PAGE. The best fractions were pooled, dialysed against 25  
568 mM HEPES/NaOH, 200 mM NaCl, 10% Glycerol, 10 mM MgCl<sub>2</sub>, pH 7.5 and the protein  
569 were stored at -80 °C.

570 *P. aeruginosa* LpoP(sol) – The protein was expressed on *E. coli* BL21(DE3) freshly  
571 transformed with from plasmid pAJFE57, encoding His<sub>6</sub>-LpoP<sup>Pa</sup>(sol). Cells were grown on  
572 1.5 L LB at 30°C to an OD<sub>578</sub> of 0.5 and expression was induced for 3h by addition of 1 mM  
573 IPTG. After harvesting, cells were resuspended in 80 mL of 25 mM Tris-HCl, 500 mM NaCl,  
574 20 mM imidazole, 10% glycerol at pH 7.5. After addition of PIC and 100 μM PMSF, cells  
575 were disrupted by sonication on ice. Debris was removed by centrifugation (130,000 × g, 1 h,  
576 4 °C) and the supernatant was applied to a 5 mL HisTrap column equilibrated in resuspension  
577 buffer. After washing with 25 mM Tris-HCl, 1 M NaCl, 40 mM imidazole, 10% glycerol at  
578 pH 7.5, protein was eluted with 25 mM Tris-HCl, 500 mM NaCl, 400 mM imidazole, 10%  
579 glycerol at pH 7.5. Fractions containing His-LpoP<sup>Pa</sup>(sol) were pooled and the His-tag was  
580 removed by addition of 4 U/mL of thrombin while dialysing against 20 mM Tris-HCl, 200  
581 mM NaCl, 10% glycerol at pH 7.5 for 20 h at 4 °C. The sample was concentrated and further  
582 purified by size exclusion column chromatography at 0.8 mL/min using a HiLoad 16/600  
583 Superdex 200 column equilibrated in 20 mM Hepes-NaOH, 200 mM NaCl, 10% glycerol at  
584 pH 7.5. LpoP<sup>Pa</sup>-containing fractions were pooled, concentrated, aliquoted and stored at -80°C.  
585

#### 586 **PG synthesis assays in the presence of detergents**

587 *In vitro* peptidoglycan synthesis assay using radiolabelled lipid II in detergents – To assay  
588 the *in vitro* PG synthesis activity of PBP1B<sup>Ec</sup> with radiolabelled lipid II substrate in the  
589 presence of detergent we used a previously published assay (Banzhaf *et al.*, 2012, Biboy *et*  
590 *al.*, 2013). Final reactions included 10 mM HEPES/NaOH pH 7.5, 150 mM NaCl, 10 mM  
591 MgCl<sub>2</sub> and 0.05 % Triton X-100. The concentration of PBP1B<sup>Ec</sup> was 0.5 μM. Reactions were  
592 carried out for 1 h at 37°C. Reactions were stopped by boiling for 5 min. Digestion with  
593 cellosyl, reduction with sodium borohydride and analysis by HPLC were performed as  
594 described (Biboy *et al.*, 2013).

595 *FRET-based in vitro* peptidoglycan synthesis assay in detergents – For assays in detergents,  
596 samples contained 50 mM HEPES/NaOH pH 7.5, 150 mM NaCl, 10 mM MgCl<sub>2</sub>, and 0.05%  
597 Triton X-100 in a final volume of 50 μL. PBP1B<sup>Ec</sup>, PBP1B<sup>Ab</sup> or PBP1B<sup>Pa</sup> were added at a  
598 concentration of 0.5 μM. When indicated, activators LpoB(sol), or LpoP<sup>Ab</sup>(sol), or  
599 LpoP<sup>Pa</sup>(sol) were added at a concentration of 2 μM. Reactions were started by the addition of  
600 an equimolar mix of lipid II, lipid II-Atto550 and lipid II-Atto647n, each at 5 μM and  
601 monitored by measuring fluorescence using a Clariostar plate reader (BMG Labtech,  
602 Germany) with excitation at 540 nm and emission measurements at 590 nm and 680 nm.  
603 Reactions were incubated at the indicated temperature for 60 or 90 min. After the reaction

604 emission spectra from 550 to 740 nm were taken in the same plate reader with excitation at  
605 522 nm. When indicated ampicillin was added at 1 mM and moenomycin was added at 50  
606  $\mu\text{M}$ . After plate reader measurements, reactions were stopped by boiling for 5 min, vacuum-  
607 dried using a speed-vac desiccator and analysed by Tris-Tricine SDS-PAGE as previously  
608 described (Van't Veer *et al.*, 2016).

609 FRET reactions in the presence of radiolabelled lipid II described in Figure 1E-F were  
610 performed using the same buffer and substrate and enzyme concentrations as for the plate  
611 reader assay but in a final volume of 350  $\mu\text{L}$ . Samples were incubated at 25  $^{\circ}\text{C}$  with shaking  
612 using an Eppendorf Thermomixer. 50  $\mu\text{L}$  aliquots were taken out at the indicated times and  
613 reactions were stopped by addition of 100  $\mu\text{M}$  moenomycin. Samples were then transferred  
614 to a 96-well plate to measure FRET as described above. Finally, samples were transferred  
615 back to Eppendorf tubes, digested with cellosyl and reduced with sodium borohydride as  
616 previously described (Biboy *et al.*, 2013).

617 *Continuous glycosyltransferase (GTase) assay using dansylated lipid II* – Continuous  
618 fluorescence GTase assays using dansylated lipid II and *A. baumannii* PBP1B were  
619 performed as previously described (Schwartz *et al.*, 2001, Offant *et al.*, 2010, Egan &  
620 Vollmer, 2016). Samples contained 50 mM HEPES/NaOH pH 7.5, 105 mM NaCl, 25 mM  
621  $\text{MgCl}_2$ , 0.039% Triton X-100 and 0.14  $\mu\text{g}/\mu\text{L}$  cellosyl muramidase in a final volume of 60  
622  $\mu\text{L}$ . PBP1B<sup>Ab</sup> was added at a concentration of 0.5  $\mu\text{M}$ . When indicated, LpoP<sup>Ab</sup>(sol) was  
623 added at a concentration of 0.5  $\mu\text{M}$ . Reactions were started by addition of dansylated lipid II  
624 to a final concentration of 10  $\mu\text{M}$  and monitored by following the decrease in fluorescence  
625 over 60 min at 37 $^{\circ}\text{C}$  using a FLUOstar OPTIMA plate reader (BMG Labtech, Germany) with  
626 excitation at 330 nm and emission at 520 nm. The fold-increase in GTase was calculated  
627 against the mean rate obtained with PBP1B<sup>Ab</sup> alone at these reaction conditions, at the fastest  
628 rate.

629 *Time-course GTase assay by SDS-PAGE followed by fluorescence detection* – PBP1B<sup>Ab</sup> at a  
630 concentration of 0.5  $\mu\text{M}$  was incubated with 5  $\mu\text{M}$  lipid II-Atto550 and 25  $\mu\text{M}$  unlabelled  
631 lipid II in the presence or absence of 1.5  $\mu\text{M}$  LpoP<sup>Ab</sup>(sol). Reactions contained 20 mM  
632 HEPES, 150 mM NaCl, 10 mM  $\text{MgCl}_2$ , 0.06% TX-100 and 1 mM Ampicillin to block  
633 transpeptidation. Aliquots were taken after 0, 2, 5, 10, 30 and 60 min incubation at 37 $^{\circ}\text{C}$ ,  
634 boiled for 10 min to stop reactions and analysed by Tris-Tricine SDS-PAGE followed by  
635 fluorescence detection as previously described (Van't Veer *et al.*, 2016).

636

## 637 **PG synthesis in liposomes**

638 *Reconstitution of class A PBPs in liposomes* – Proteoliposomes containing class A PBPs were  
639 prepared as described previously with some modifications (Egan *et al.*, 2015, Rigaud &  
640 Lévy, 2003, Hernández-Rocamora *et al.*, 2018). The appropriate lipid or mixture of lipids  
641 were dried in a glass test tube under stream of N<sub>2</sub> to form a lipid film followed by desiccation  
642 under vacuum from 2 h. When labelled lipid II was co-reconstituted with the indicated class  
643 A PBP, they were added at 1:200 mol:mol phospholipid to each lipid II-Atto550 and lipid II-  
644 Atto647n. Resuspension into multilamellar vesicles (MLVs) was achieved by addition of 20  
645 mM Tris/HCl, pH 7.5 with or without 150 mM NaCl as indicated in each experiment and  
646 several cycles of vigorous mixing and short incubations in hot tap water. The final lipid  
647 concentration was 5 g/L. To form large unilamellar vesicles (LUVs), MLVs were subjected  
648 to 10 freeze-thaw cycles and then extruded 10 times through a 0.2 µm filter. LUVs were  
649 destabilised by the addition of Triton X-100 to an effective detergent:lipid ratio of 1.40 and  
650 mixed with proteins in different protein to lipid molar ratios (1:3000 for PBP1B<sup>Ec</sup> and  
651 PBP1B<sup>Pa</sup>, and 1:2000 for PBP1B<sup>Ab</sup>). After incubation at 4°C for 1 h, prewashed adsorbent  
652 beads (Biobeads SM2, BioRad, USA; 100 mg per 3 µmol of Triton X-100) were added to the  
653 sample to remove detergents. Biobeads were exchanged after 2 and 16 h, followed by  
654 incubation with fresh Biobeads for a further 2 h. After removal of Biobeads by short  
655 centrifugation at 4,000×g, liposomes were pelleted at 250,000×g for 30 min at 4°C. The  
656 pellet containing proteoliposomes was resuspended using the appropriate buffer. The  
657 resuspension was done in a 43% smaller volume than the volume added of lipid II, so that the  
658 final concentration of lipids was 11.6 g/L. Samples were then centrifuged for 5 min at  
659 17,000×g and 4°C to remove any possible aggregates. The supernatant was then used in the  
660 appropriate assays. Liposomes were analysed by SDS-PAGE and, only for liposomes without  
661 labelled lipid II, also by bicinchoninic acid assay (Pierce BCA Assay Kit, ThermoFisher  
662 Scientific, USA) to determine protein concentration. The concentration of protein for  
663 liposomes with labelled lipid II was calculated by densitometry of the samples in SDS-PAGE  
664 gels, after reactions were carried out.

665 *PBP1B<sup>Ec</sup> orientation assay.* To assess the orientation of liposome-reconstituted PBP1B<sup>Ec</sup>,  
666 MGC-<sup>64</sup>PBP1B-his C777S C795S mutant containing a single cysteine in the N-terminal  
667 region was reconstituted in liposomes with EcPL as described above. The accessibility of the  
668 cysteine was determined using sulfhydryl-reactive fluorescent probe AlexaFluor555-  
669 maleimide. Reactions containing 0.5 µM protein, 10 µM AlexaFluor555-maleimide, 0.2 mM  
670 TCEP were incubated for 16 h at 4°C in the presence or absence 0.5% Triton X-100.

671 Reactions were stopped by addition of 5 mM DTT and boiling for 5 min. Samples were  
672 loaded in a 10% acrylamide gel and, after electrophoresis, gels were first scanned using an  
673 Amersham Typhoon Trio with excitation at 533 nm and a 40 nm-wide band-pass emission  
674 filter at 580 nm. The gel was then stained by Coomassie.

675 *In vitro* peptidoglycan synthesis assay using radiolabelled lipid II in liposomes – The same  
676 methodology as in detergents was used to assay the *in vitro* PG synthesis activity of PBP1B<sup>Ec</sup>  
677 in liposomes, with minor modifications. To start reactions, 1.5 nmol [<sup>14</sup>C]-labelled lipid II  
678 were dried in a 0.5 mL glass tube using a vacuum concentrator, resuspended in 5 µL of the  
679 appropriate liposome buffer, and mixed with liposomes, buffer and MgCl<sub>2</sub> to a total volume  
680 of 50 µL. Final reactions contained 0.5 µM PBP1B<sup>Ec</sup>, 30 µM lipid II and 1 mM MgCl<sub>2</sub> in 20  
681 mM Tris/HCl pH 7.5 with or without 150 mM NaCl as indicated for each experiment.  
682 Samples were incubated for 90 min at 37°C with shaking at 800 rpm. Reactions were stopped  
683 by boiling for 5 min. Digestion with cellosyl, reduction with sodium borohydride and  
684 analysis by HPLC were performed as described (Biboy *et al.*, 2013).

685 *FRET-based in vitro* peptidoglycan synthesis assay in liposomes – For assays with liposomes,  
686 samples contained 20 mM Tris pH 7.5, 1 mM MgCl<sub>2</sub> in a final volume of 50 µL. In this case,  
687 the same volume for each liposome preparation was added to the reactions, 10 µL, so that the  
688 total amount of labelled lipid II was present in every reaction. In these conditions,  
689 concentration of lipid II-Atto550 and lipid II-Atto647n would be 14.5 µM each, assuming no  
690 loss of lipids during sample preparation. The final concentration of enzymes, determined by  
691 densitometry of SDS-PAGE gels, were ~0.59 µM for PBP1B<sup>Ec</sup>, ~0.81 µM for PBP1B<sup>Ab</sup>, and  
692 ~0.53 µM for PBP1B<sup>Pa</sup>. When indicated, activators LpoB(sol), LpoP<sup>Ab</sup>(sol), or LpoP<sup>Pa</sup>(sol)  
693 were added at a concentration of 2 µM. Reactions were started by the addition of lipid II at 12  
694 µM and monitored by measuring fluorescence over a period of 60 min (or 90 min for  
695 PBP1B<sup>Pa</sup> liposomes) at 37°C using a Clariostar plate reader (BMG Labtech, Germany), with  
696 emission measurements at 590 nm and 680 nm after excitation at 522 nm. When indicated  
697 ampicillin was added at 1 mM and moenomycin was added at 50 µM. Activity assays were  
698 performed immediately after preparation of liposomes was finished, as we noticed that some  
699 proteins could slowly start polymerization using the labelled lipid II. After reactions, samples  
700 were analysed by Tris-Tricine SDS-PAGE as indicated for detergents.

701

## 702 **Assays in supported lipid bilayers**

703 *Preparation of small unilamellar vesicles (SUVs) and proteoliposomes for SLB formation* –  
704 Liposomes of *EcPL* lipids and proteoliposomes with reconstituted PBP1B<sup>Ec</sup> were prepared as

705 described previously by addition of beta-cyclodextrin to the solution of lipids and Triton X-  
706 100 detergent (DeGrip *et al.*, 1998, Roder *et al.*, 2011). Briefly, a thin lipid film of *E. coli*  
707 polar lipid extract was prepared by N<sub>2</sub> assisted chloroform evaporation. After 2h of drying  
708 under vacuum the lipid film was re-hydrated to 5 mM (total phosphorus concentration) in 150  
709 mM NaCl, 10 mM Tris-HCl, pH 7.4 supplemented with 20 mM Triton X-100. The  
710 suspension of lipids/detergent was extensively vortex, freeze/thawed for 5 cycles and  
711 sonicated using a water-bath sonicator for 10 min (on ice, to avoid lipids overheating upon  
712 sonication). To prepare proteoliposomes, full length PBP1B produced as described above and  
713 containing 0.05% Triton X-100 was mixed with a lipid-detergent suspension at the indicated  
714 ratio, usually 1:25000 (protein:lipids) and incubated for 10 min at RT. Incorporation of  
715 PBP1B<sup>Ec</sup> into liposomes was achieved by addition of 2× excess of beta-cyclodextrin solution  
716 for 5 min (at RT) with subsequent 20-fold dilution in 20 mM Hepes, pH 7.4. The rapid  
717 depletion of detergent by addition of beta-cyclodextrin leads to formation of very small  
718 unilamellar vesicles with an average diameter of 18-25 nm and narrow size distribution  
719 (Roder *et al.*, 2011).

720 To prepare liposomes with fluorescently labelled lipid II the extract of *E. coli* polar  
721 lipids was supplemented with 2 mol% solution of either lipid II-Atto550 or lipid II-Atto647n.  
722 The lipid film was treated similar as the film for preparation of proteoliposomes. Liposomes  
723 were also prepared by cyclodextrin-assisted extraction of Triton X-100.

724 *Formation of polymer-supported lipid bilayers (SLBs) and reconstitution of PBP1B<sup>Ec</sup> into a*  
725 *supported lipid membrane* – To form polymer-supported lipid membranes the coverslips  
726 were functionalised beforehand with a dense PEG film, where the ends of the polymer brush  
727 were covalently modified with palmitic acid, which served as a linker to capture liposomes as  
728 described elsewhere (Roder *et al.*, 2011). To perform a FRET assay on supported lipid  
729 membrane empty EcPL liposomes (i), liposomes with 2 mol% of either lipid II-Atto550 (ii)  
730 or lipid II-Atto647n (iii), and PBP1B<sup>Ec</sup> proteoliposomes (iv) were mixed at equimolar ratio;  
731 and diluted by 20-fold with the 10 mM Tris pH 7.5 buffer directly in the reaction chamber.  
732 After 30 min of incubation at 37 °C the reaction chamber was washed 5 times by solution  
733 exchange. Proteoliposomes adsorbed on the surface were fused by the addition of 10% (w/v)  
734 PEG 8kDa solution (in water). The fusion reaction was carried for 15 min at 37°C, afterwards  
735 PEG solution was rigorously washed out. Fluidity and homogeneity of the lipid membrane  
736 were checked either with PE-Rhodamine dye (Avanti) or by addition of a His<sub>6</sub>-tagged (on the  
737 C-terminus) neutral peptide (CMSQAALNTRNSEEVSSRRNNGTRHHHHHH) labelled

738 with a single Alexa 488 fluorophore on its only Cys residue at the N-terminus to the EcPL  
739 membrane containing 0.1 mol% dioctadecylamine (DODA)-tris-Ni-NTA (Beutel *et al.*,  
740 2014).

741 *FRET-based in vitro peptidoglycan synthesis assay in supported lipid bilayers using TIRF*  
742 *microscopy* – Peptidoglycan synthesis reactions were carried out at 10 mM Tris pH 7.5  
743 supplemented with 1 mM MgCl<sub>2</sub>, with or without 1 mM Ampicillin and in the presence of  
744 4 μM LpoB(sol). The reaction was started by addition of 4 μM of unlabelled lipid II. TIRF  
745 microscopy, using a set up described elsewhere(Baranova *et al.*, 2020) was used to monitor  
746 an increase in FRET efficiency and spatial reorganization of FRET signal over the time  
747 course of PG synthesis. To detect real-time FRET on supported lipid membranes we used the  
748 so-called “acceptor photobleaching approach” where a region of interest of about 10×10 μm  
749 was photobleached in the acceptor channel (lipid II-Atto647n) and the increase in  
750 fluorescence intensity of the donor (lipid II-Atto550) was recorded within a delay of 1s. The  
751 FRET efficiency was calculated as described(Loose *et al.*, 2011). Briefly, donor intensity  
752 levels were calculated before ( $I^D$ ) and after photobleaching ( $I^{D,pb}$ ) using intensity  
753 measurements in ImageJ. FRET efficiency was calculated using Equation 1:

754 (1) 
$$E = (I^{D,pb} - I^D) / I^{D,pb}$$

755 For time-course measurements (Figure 4D) the acceptor signal (lipid II-Atto647n)  
756 was photobleached every minute after the initiation of the reaction (the data point at time 0  
757 corresponds to addition of unlabelled lipid II). For each time point a new region of interest in  
758 the same chamber was photobleached, and the change in the donor intensity was recorded to  
759 calculate FRET efficiency using Eq.1.

760 To have a control on the lipid membrane integrity during PG synthesis the  
761 phospholipid DODA-tris-Ni-NTA (Beutel *et al.*, 2014) was included during reconstitution at  
762 a 0.1 mol% ratio. DODA-tris-Ni-NTA was then visualized using a His<sub>6</sub>-containing peptide  
763 (CMSQAALNTRNSEEEVSSRRNNGTRHHHHH) labelled with Alexa488 on its single  
764 Cys residue, which we added in the same experiment in which we performed FRET analysis.  
765 To compare the fluidity and the immobile fraction of lipid II-Atto647n before and after 1 h of  
766 the synthesis reaction with the fluidity of phospholipids in the lipid membrane, the same  
767 region of interest was photobleached with a laser first at 640 nm and afterwards at 480 nm.

768 *In vitro peptidoglycan synthesis assay using radiolabelled lipid II on supported lipid bilayers*  
769 – To assay PG synthesis on supported lipid bilayers (SLBs) using radioactively labelled lipid  
770 II, we first reconstituted PBP1B<sup>Ec</sup> on SLBs containing *E. coli* polar lipid extract and a 1:10<sup>5</sup>  
771 PBP1B<sup>Ec</sup> to lipid molar ratio, as described above. Due to the low density of the enzyme,



772 several 1.1 cm<sup>2</sup> chambers were assayed for every condition in order to accumulate a  
773 measurable signal. In every chamber, reactions were started by addition of 10 μM [<sup>14</sup>C]-  
774 labelled lipid II and 4 μM LpoB(sol) in a total volume of 100 μL per chamber. The synthesis  
775 reaction was carried out in 10 mM Tris pH 7.5, 1 mM MgCl<sub>2</sub>. The chambers were incubated  
776 overnight (~16h) at 37°C, covered with parafilm. Reactions were stopped by addition of 100  
777 μM moenomycin. To digest the produced peptidoglycan, cellosyl was added at 0.05 g/L, in  
778 the presence of 0.3% triton X-100. After 1h incubation at 37°C, samples from 6 Chambers  
779 were pooled in an Eppendorf tube, concentrated using a speed-vac evaporator, reduced using  
780 sodium borohydride and analysed by HPLC as described above. For the experiment to  
781 determine lipid II incorporation and the localisation of the produced PG, before addition of  
782 moenomycin, chambers were washed by removal of 50 μL of buffer and addition of 50 μL of  
783 fresh buffer while mixing. This was repeated 5 times. The removed volume from each wash  
784 was pooled and treated the same as the samples left in the chamber.

785 *Single molecule tracking and analysis* – To perform single molecular tracking, MGC-  
786 <sup>64</sup>PBP1B-his C77S C795S was labelled with the photostable far-red dye Dy647N as  
787 described above and then reconstituted into a polymer-supported lipid membrane as  
788 described elsewhere (Roder *et al.*, 2011, Roder *et al.*, 2014). Single molecule tracking  
789 experiments were performed at a low protein to lipid molar ratio (1:10<sup>-6</sup>). At this ratio,  
790 supported lipid membrane was largely homogeneous with the lowest immobile fraction from  
791 all the ratios tested (Figure 3 – figure supplement 1). The single-molecule motion of PBP1B  
792 was measured prior and after the addition of 1.5 μM lipid II after 15 min ex situ incubation,  
793 in the presence of 10 mM Hepes pH 7.4, 150mM NaCl, 1 mM MgCl<sub>2</sub> buffer and in the  
794 absence of LpoB(sol). The localization and tracking of PBP1B particles was performed by  
795 the SLIMfast software (Serge *et al.*, 2008). To ensure that non-specifically stuck PBP1B  
796 particles did not contribute to the measured diffusion coefficient the localized movies, the  
797 immobile particles were excluded using the DBSCAN spatial clustering algorithm (Sander *et al.*,  
798 1998) with the following clustering parameters: a search area of 100 nm, the minimal  
799 time window of 30 frames at 65 ms/frame acquisition time. The displacement distributions  
800 for active PBP1B (in the presence of lipid II) was compared to the displacement distribution  
801 of PBP1B before lipid II addition by fitting the two-component Rayleigh distribution and  
802 comparing the weighted contribution of each population. The mean-squared displacement  
803 was fitted to each individual trajectory longer than 650 ms (10 frames). Each MSD curve was  
804 fitted with a linear fit considering max 30% of the lag-time for each trajectory.

805 *FRAP analysis* – To control membrane fluidity upon the reconstitution of the transmembrane  
806 PBP1B (Figure 3 – figure supplement 1 and Figure 4 – figure supplement 1) and fluidity of  
807 lipid II Atto-647n during peptidoglycan synthesis (Figure 4E-F) we used a Matlab-based GUI  
808 *frap\_analysis* (Jönsson, 2020) in details described elsewhere (Jönsson *et al.*, 2008). This code  
809 allows to quantify the contribution of the immobile fraction to the estimated diffusion  
810 coefficient, and particularly suitable for the analysis of 2D diffusion with the photobleaching  
811 contribution during the recovery.

812

### 813 **ACKNOWLEDGEMENTS**

814 We thank Alexander Egan (Newcastle University) for purified proteins LpoB(sol) and  
815 LpoP<sup>Pa</sup>(sol), Oliver Birkholz and Jacob Piehler for their help with PBP1B reconstitution into  
816 polymer-SLBs and initial guidance on single particle tracking. We also acknowledge  
817 Changjiang You for providing tris-DODA-NTA reagent. This work was funded by the  
818 BBSRC grant BB/R017409/1 (to W.V.), by the European Research Council through grant  
819 ERC-2015-StG-679239 (to M.L.), and long-term fellowships HFSP LT 000824/2016-L4 and  
820 EMBO ALTF 1163-2015 (to N.B.).

821

### 822 **CONFLICT OF INTEREST**

823 The authors declare no competing financial interests.

824

### 825 **REFERENCES**

- 826 Banzhaf, M., van den Berg van Saparoea, B., Terrak, M., Fraipont, C., Egan, A., Philippe, J.,  
827 Zapun, A., Breukink, E., Nguyen-Disteche, M., den Blaauwen, T., and Vollmer, W.  
828 (2012) Cooperativity of peptidoglycan synthases active in bacterial cell elongation.  
829 *Mol Microbiol* **85**: 179-194.
- 830 Baranova, N., Radler, P., Hernández-Rocamora, V.M., Alfonso, C., López-Pelegrín, M.,  
831 Rivas, G., Vollmer, W., and Loose, M. (2020) Diffusion and capture permits dynamic  
832 coupling between treadmilling FtsZ filaments and cell division proteins. *Nat*  
833 *Microbiol* **5**(3):407-417.
- 834 Barrett, D., Wang, T.S., Yuan, Y., Zhang, Y., Kahne, D., and Walker, S. (2007) Analysis of  
835 glycan polymers produced by peptidoglycan glycosyltransferases. *J Biol Chem* **282**:  
836 31964-31971.

- 837 Bertsche, U., Breukink, E., Kast, T., and Vollmer, W. (2005) *In vitro* murein (peptidoglycan)  
838 synthesis by dimers of the bifunctional transglycosylase-transpeptidase PBP1B from  
839 *Escherichia coli*. *J Biol Chem* **280**: 38096-38101.
- 840 Bertsche, U., Kast, T., Wolf, B., Fraipont, C., Aarsman, M.E., Kannenberg, K., von  
841 Rechenberg, M., Nguyen-Disteche, M., den Blaauwen, T., Höltje, J.V., and Vollmer,  
842 W. (2006) Interaction between two murein (peptidoglycan) synthases, PBP3 and  
843 PBP1B, in *Escherichia coli*. *Mol Microbiol* **61**: 675-690.
- 844 Beutel, O., Nikolaus, J., Birkholz, O., You, C., Schmidt, T., Herrmann, A., and Piehler, J.  
845 (2014) High-fidelity protein targeting into membrane lipid microdomains in living  
846 cells. *Angew Chem Int Ed Engl* **53**: 1311-1315.
- 847 Biboy, J., Bui, N.K., and Vollmer, W., (2013) *In vitro* peptidoglycan synthesis assay with  
848 lipid II substrate. *In: Bacterial Cell Surfaces: Methods and Protocols*. A.H. Delcour  
849 (eds). Totowa, NJ: Humana Press, pp. 273-288.
- 850 Born, P., Breukink, E., and Vollmer, W. (2006) *In vitro* synthesis of cross-linked murein and  
851 its attachment to sacculi by PBP1A from *Escherichia coli*. *J Biol Chem* **281**: 26985-  
852 26993.
- 853 Breukink, E., van Heusden, H.E., Vollmerhaus, P.J., Swiezewska, E., Brunner, L., Walker,  
854 S., Heck, A.J., and de Kruijff, B. (2003) Lipid II is an intrinsic component of the pore  
855 induced by nisin in bacterial membranes. *J Biol Chem* **278**: 19898-19903.
- 856 Catherwood, A.C., Lloyd, A.J., Tod, J.A., Chauhan, S., Slade, S.E., Walkowiak, G., Galley,  
857 N.F., Puneekar, A., Smart, K., Rea, D., Evans, N.D., Chappell, M.J., Roper, D.I., and  
858 Dowson, C.G. (2020) Substrate and stereochemical control of peptidoglycan  
859 crosslinking by transpeptidation by *Escherichia coli* PBP1B. *J Am Chem Soc*  
860 **142**(11):5034-5048.
- 861 Caveney, N.A., Egan, A.J.F., Ayala, I., Laguri, C., Robb, C.S., Breukink, E., Vollmer, W.,  
862 Strynadka, N.C.J., and Simorre, J.-P. (2020) Structure of the peptidoglycan synthase  
863 activator LpoP in *Pseudomonas aeruginosa*. *Structure* **28**: 643-650.e645.
- 864 Cho, H., Wivagg, C.N., Kapoor, M., Barry, Z., Rohs, P.D.A., Suh, H., Marto, J.A., Garner,  
865 E.C., and Bernhardt, T.G. (2016) Bacterial cell wall biogenesis is mediated by SEDS  
866 and PBP polymerase families functioning semi-autonomously. *Nat Microbiol* **1**:  
867 16172.
- 868 DeGrip, J.W., VanOostrum, J., and Bovee-Geurts, P.H.M. (1998) Selective detergent-  
869 extraction from mixed detergent/lipid/protein micelles, using cyclodextrin inclusion

- 870 compounds: a novel generic approach for the preparation of proteoliposomes.  
871 *Biochem J* **330**: 667.
- 872 Derouaux, A., Wolf, B., Fraipont, C., Breukink, E., Nguyen-Disteche, M., and Terrak, M.  
873 (2008) The monofunctional glycosyltransferase of *Escherichia coli* localizes to the  
874 cell division site and interacts with penicillin-binding protein 3, FtsW, and FtsN. *J*  
875 *Bacteriol* **190**: 1831-1834.
- 876 Egan, A.J., Biboy, J., van't Veer, I., Breukink, E., and Vollmer, W. (2015) Activities and  
877 regulation of peptidoglycan synthases. *Philos Trans R Soc Lond B Biol Sci*  
878 **370**(1679):20150031.
- 879 Egan, A.J., Cleverley, R.M., Peters, K., Lewis, R.J., and Vollmer, W. (2017) Regulation of  
880 bacterial cell wall growth. *FEBS J* **284**: 851-867.
- 881 Egan, A.J., and Vollmer, W. (2016) Continuous fluorescence assay for peptidoglycan  
882 glycosyltransferases. *Meth Mol Biol* **1440**: 171-184.
- 883 Egan, A.J.F., Errington, J., and Vollmer, W. (2020) Regulation of peptidoglycan synthesis  
884 and remodelling. *Nat Rev Microbiol* **18**: 446-460.
- 885 Egan, A.J.F., Jean, N.L., Koumoutsi, A., Bougault, C.M., Biboy, J., Sassine, J., Solovyova,  
886 A.S., Breukink, E., Typas, A., Vollmer, W., and Simorre, J.-P. (2014) Outer-  
887 membrane lipoprotein LpoB spans the periplasm to stimulate the peptidoglycan  
888 synthase PBP1B. *Proc Nat Acad Sci U S A* **111**: 8197-8202.
- 889 Egan, A.J.F., Maya-Martinez, R., Ayala, I., Bougault, C.M., Banzhaf, M., Breukink, E.,  
890 Vollmer, W., and Simorre, J.P. (2018) Induced conformational changes activate the  
891 peptidoglycan synthase PBP1B. *Mol Microbiol* **110**: 335-356.
- 892 Frere, J.M., Leyh-Bouille, M., Ghuysen, J.M., Nieto, M., and Perkins, H.R. (1976)  
893 Exocellular DD-carboxypeptidases-transpeptidases from *Streptomyces*. *Methods*  
894 *Enzymol* **45**: 610-636.
- 895 Gavutis, M., Jaks, E., Lamken, P., and Pihler, J. (2006) Determination of the Two-  
896 Dimensional Interaction Rate Constants of a Cytokine Receptor Complex. *Biophys J*  
897 **90**: 3345-3355.
- 898 Goffin, C., and Ghuysen, J.M. (1998) Multimodular penicillin-binding proteins: an enigmatic  
899 family of orthologs and paralogs. *Microbiol Mol Biol Rev* **62**: 1079-1093.
- 900 Gray, A.N., Egan, A.J., Van't Veer, I.L., Verheul, J., Colavin, A., Koumoutsi, A., Biboy, J.,  
901 Altelaar, A.F., Damen, M.J., Huang, K.C., Simorre, J.P., Breukink, E., den Blaauwen,  
902 T., Typas, A., Gross, C.A., and Vollmer, W. (2015) Coordination of peptidoglycan

- 903 synthesis and outer membrane constriction during *Escherichia coli* cell division. *eLife*  
904 4:e07118.
- 905 Greene, N.G., Fumeaux, C., and Bernhardt, T.G. (2018) Conserved mechanism of cell-wall  
906 synthase regulation revealed by the identification of a new PBP activator in  
907 *Pseudomonas aeruginosa*. *Proc Natl Acad Sci U S A* **115**: 3150-3155.
- 908 Gutheil, W.G., Stefanova, M.E., and Nicholas, R.A. (2000) Fluorescent coupled enzyme  
909 assays for D-alanine: application to penicillin-binding protein and vancomycin  
910 activity assays. *Anal Biochem* **287**: 196-202.
- 911 Hernández-Rocamora, V.M., Otten, C.F., Radkov, A., Simorre, J.-P., Breukink, E.,  
912 VanNieuwenhze, M., and Vollmer, W. (2018) Coupling of polymerase and carrier  
913 lipid phosphatase prevents product inhibition in peptidoglycan synthesis. *Cell Surf* **2**:  
914 1-13.
- 915 Hsu, Y.P., Hall, E., Booher, G., Murphy, B., Radkov, A.D., Yablonowski, J., Mulcahey, C.,  
916 Alvarez, L., Cava, F., Brun, Y.V., Kuru, E., and VanNieuwenhze, M.S. (2019)  
917 Fluorogenic D-amino acids enable real-time monitoring of peptidoglycan biosynthesis  
918 and high-throughput transpeptidation assays. *Nat Chem* **11**: 335-341.
- 919 Huang, S.H., Wu, W.S., Huang, L.Y., Huang, W.F., Fu, W.C., Chen, P.T., Fang, J.M.,  
920 Cheng, W.C., Cheng, T.J., and Wong, C.H. (2013) New continuous fluorometric  
921 assay for bacterial transglycosylase using Förster resonance energy transfer. *J Am*  
922 *Chem Soc* **135**: 17078-17089.
- 923 Izaki, K., Matsushashi, M., and Strominger, J.L. (1968) Biosynthesis of the peptidoglycan of  
924 bacterial cell walls: XIII. Peptidoglycan transpeptidase and D-alanine  
925 carboxypeptidase: Penicillin-sensitive enzymatic reaction in strains of *Escherichia*  
926 *coli*. *J Biol Chem* **243**: 3180-3192.
- 927 Jean, N.L., Bougault, C.M., Lodge, A., Derouaux, A., Callens, G., Egan, A.J., Ayala, I.,  
928 Lewis, R.J., Vollmer, W., and Simorre, J.P. (2014) Elongated structure of the outer-  
929 membrane activator of peptidoglycan synthesis LpoA: implications for PBP1A  
930 stimulation. *Structure* **22**: 1047-1054.
- 931 Peter Jönsson (2020). frap\_analysis  
932 ([https://www.mathworks.com/matlabcentral/fileexchange/29388-frap\\_analysis](https://www.mathworks.com/matlabcentral/fileexchange/29388-frap_analysis)),  
933 MATLAB Central File Exchange. Retrieved 2020.
- 934 Jönsson, P., Jonsson, M.P., Tegenfeldt, J.O., and Höök, F. (2008) A method improving the  
935 accuracy of fluorescence recovery after photobleaching analysis. *Biophys J* **95**: 5334-  
936 5348.

- 937 Kumar, V.P., Basavannacharya, C., and de Sousa, S.M. (2014) A microplate assay for the  
938 coupled transglycosylase-transpeptidase activity of the penicillin binding proteins; a  
939 vancomycin-neutralizing tripeptide combination prevents penicillin inhibition of  
940 peptidoglycan synthesis. *Biochem Biophys Res Commun* **450**: 347-352.
- 941 Lebar, M.D., Lupoli, T.J., Tsukamoto, H., May, J.M., Walker, S., and Kahne, D. (2013)  
942 Forming cross-linked peptidoglycan from synthetic gram-negative Lipid II. *J Am*  
943 *Chem Soc* **135**: 4632-4635.
- 944 Lee, T.K., Meng, K., Shi, H., and Huang, K.C. (2016) Single-molecule imaging reveals  
945 modulation of cell wall synthesis dynamics in live bacterial cells. *NatComm* **7**: 13170.
- 946 Loose, M., Fischer-Friedrich, E., Herold, C., Kruse, K., and Schwille, P. (2011) Min protein  
947 patterns emerge from rapid rebinding and membrane interaction of MinE. *Nat Struct*  
948 *Mol Biol* **18**: 577-583.
- 949 Lupoli, T.J., Lebar, M.D., Markovski, M., Bernhardt, T., Kahne, D., and Walker, S. (2014)  
950 Lipoprotein activators stimulate *Escherichia coli* penicillin-binding proteins by  
951 different mechanisms. *J Am Chem Soc* **136**: 52-55.
- 952 Macheboeuf, P., Contreras-Martel, C., Job, V., Dideberg, O., and Dessen, A. (2006)  
953 Penicillin binding proteins: key players in bacterial cell cycle and drug resistance  
954 processes. *FEMS Microbiol Rev* **30**: 673-691.
- 955 Meeske, A.J., Riley, E.P., Robins, W.P., Uehara, T., Mekalanos, J.J., Kahne, D., Walker, S.,  
956 Kruse, A.C., Bernhardt, T.G., and Rudner, D.Z. (2016) SEDS proteins are a  
957 widespread family of bacterial cell wall polymerases. *Nature* **537**: 634-638.
- 958 Mohammadi, T., Sijbrandi, R., Lutters, M., Verheul, J., Martin, N.I., den Blaauwen, T., de  
959 Kruijff, B., and Breukink, E. (2014) Specificity of the transport of lipid II by FtsW in  
960 *Escherichia coli*. *J Biol Chem* **289**: 14707-14718.
- 961 Muller, P., Ewers, C., Bertsche, U., Anstett, M., Kallis, T., Breukink, E., Fraipont, C., Terrak,  
962 M., Nguyen-Disteche, M., and Vollmer, W. (2007) The essential cell division protein  
963 FtsN interacts with the murein (peptidoglycan) synthase PBP1B in *Escherichia coli*. *J*  
964 *Biol Chem* **282**: 36394-36402.
- 965 Offant, J., Terrak, M., Derouaux, A., Breukink, E., Nguyen-Disteche, M., Zapun, A., and  
966 Vernet, T. (2010) Optimization of conditions for the glycosyltransferase activity of  
967 penicillin-binding protein 1a from *Thermotoga maritima*. *FEBS J* **277**: 4290-4298.
- 968 Paradis-Bleau, C., Markovski, M., Uehara, T., Lupoli, T.J., Walker, S., Kahne, D.E., and  
969 Bernhardt, T.G. (2010) Lipoprotein cofactors located in the outer membrane activate  
970 bacterial cell wall polymerases. *Cell* **143**: 1110-1120.

- 971 Pazos, M., Peters, K., Casanova, M., Palacios, P., VanNieuwenhze, M., Breukink, E.,  
972 Vicente, M., and Vollmer, W. (2018) Z-ring membrane anchors associate with cell  
973 wall synthases to initiate bacterial cell division. *Nat Commun* **9**: 5090.
- 974 Qiao, Y., Lebar, M.D., Schirner, K., Schaefer, K., Tsukamoto, H., Kahne, D., and Walker, S.  
975 (2014) Detection of lipid-linked peptidoglycan precursors by exploiting an  
976 unexpected transpeptidase reaction. *J Am Chem Soc* **136**: 14678-14681.
- 977 Qiao, Y., Srisuknimit, V., Rubino, F., Schaefer, K., Ruiz, N., Walker, S., and Kahne, D.  
978 (2017) Lipid II overproduction allows direct assay of transpeptidase inhibition by  
979 beta-lactams. *Nat Chem Biol* **13**: 793-798.
- 980 Rigaud, J.-L., and Lévy, D., (2003) Reconstitution of membrane proteins into liposomes. *In*:  
981 *Methods in Enzymology*. Academic Press, pp. 65-86.
- 982 Roder, F., Waichman, S., Paterok, D., Schubert, R., Richter, C., Liedberg, B., and Piehler, J.  
983 (2011) Reconstitution of membrane proteins into polymer-supported membranes for  
984 probing diffusion and interactions by single molecule techniques. *AnalChem* **83**:  
985 6792-6799.
- 986 Roder, F., Wilmes, S., Richter, C.P., and Piehler, J. (2014) Rapid transfer of transmembrane  
987 proteins for single molecule dimerization assays in polymer-supported membranes.  
988 *ACS Chem Biol* **9**: 2479-2484.
- 989 Sander, J., Ester, M., Kriegel, H.-P., and Xu, X. (1998) Density-Based Clustering in Spatial  
990 Databases: The Algorithm GDBSCAN and Its Applications. *Data Mining Knowledge*  
991 *Discovery* **2**: 169-194.
- 992 Sauvage, E., and Terrak, M. (2016) Glycosyltransferases and transpeptidases/penicillin-  
993 binding proteins: valuable targets for new antibacterials. *Antibiotics (Basel)* **5**(1):12.
- 994 Schwartz, B., Markwalder, J.A., and Wang, Y. (2001) Lipid II: total synthesis of the bacterial  
995 cell wall precursor and utilization as a substrate for glycosyltransfer and  
996 transpeptidation by penicillin binding protein (PBP) 1b of *Escherichia coli*. *J Am*  
997 *Chem Soc* **123**: 11638-11643.
- 998 Serge, A., Bertaux, N., Rigneault, H., and Marguet, D. (2008) Dynamic multiple-target  
999 tracing to probe spatiotemporal cartography of cell membranes. *Nat Methods* **5**: 687-  
1000 694.
- 1001 Sjodt, M., Brock, K., Dobihal, G., Rohs, P.D.A., Green, A.G., Hopf, T.A., Meeske, A.J.,  
1002 Srisuknimit, V., Kahne, D., Walker, S., Marks, D.S., Bernhardt, T.G., Rudner, D.Z.,  
1003 and Kruse, A.C. (2018) Structure of the peptidoglycan polymerase RodA resolved by  
1004 evolutionary coupling analysis. *Nature* **556**: 118-121.

- 1005 Sjodt, M., Rohs, P.D.A., Gilman, M.S.A., Erlandson, S.C., Zheng, S., Green, A.G., Brock,  
1006 K.P., Taguchi, A., Kahne, D., Walker, S., Marks, D.S., Rudner, D.Z., Bernhardt, T.G.,  
1007 and Kruse, A.C. (2020) Structural coordination of polymerization and crosslinking by  
1008 a SEDS-bPBP peptidoglycan synthase complex. *Nat Microbiol* **5**(6):813-820.
- 1009 Typas, A., Banzhaf, M., Gross, C.A., and Vollmer, W. (2012) From the regulation of  
1010 peptidoglycan synthesis to bacterial growth and morphology. *Nat Rev Microbiol* **10**:  
1011 123-136.
- 1012 Typas, A., Banzhaf, M., van den Berg van Saparoea, B., Verheul, J., Biboy, J., Nichols, R.J.,  
1013 Zietek, M., Beilharz, K., Kannenberg, K., von Rechenberg, M., Breukink, E., den  
1014 Blaauwen, T., Gross, C.A., and Vollmer, W. (2010) Regulation of peptidoglycan  
1015 synthesis by outer-membrane proteins. *Cell* **143**: 1097-1109.
- 1016 van't Veer, I., (2016) Peptidoglycan synthesis in *Escherichia coli* from a PBP1b perspective.  
1017 *PhD Thesis*: Bijvoet Center for Biomolecular Research. Utrecht, The Netherlands:  
1018 Utrecht University.
- 1019 Van't Veer, I.L., Leloup, N.O., Egan, A.J., Janssen, B.J., Martin, N.I., Vollmer, W., and  
1020 Breukink, E. (2016) Site-specific immobilization of the peptidoglycan synthase  
1021 PBP1B on a surface plasmon resonance chip surface. *ChemBioChem* **17**: 2250-2256.
- 1022 VanNieuwenhze, M.S., Mauldin, S.C., Zia-Ebrahimi, M., Winger, B.E., Hornback, W.J.,  
1023 Saha, S.L., Aikins, J.A., and Blaszczyk, L.C. (2002) The first total synthesis of lipid  
1024 II: the final monomeric intermediate in bacterial cell wall biosynthesis. *J Am Chem*  
1025 *Soc* **124**: 3656-3660.
- 1026 Verveer, P.J.R., O.; Harpur, A.G.; Bastiaens, P.I.H., (2005) Measuring FRET by acceptor  
1027 photobleaching. *In*: Protein-Protein Interactions: A Molecular Cloning Manual. E.A.  
1028 Golemis, P.D. (ed). Cold Spring Harbor, NY, USA: Cold Spring Harbor Press, pp.  
1029 4598-4601.
- 1030 Vigouroux, A., Cordier, B., Aristov, A., Alvarez, L., Özbaykal, G., Chaze, T., Oldewurtel,  
1031 E.R., Matondo, M., Cava, F., Bikard, D., and van Teeffelen, S. (2020) Class-A  
1032 penicillin binding proteins do not contribute to cell shape but repair cell-wall defects.  
1033 *eLife* **9**: e51998.
- 1034 Vollmer, W., Blanot, D., and de Pedro, M.A. (2008) Peptidoglycan structure and architecture.  
1035 *FEMS Microbiol Rev* **32**: 149-167.
- 1036 Ye, X.Y., Lo, M.C., Brunner, L., Walker, D., Kahne, D., and Walker, S. (2001) Better  
1037 substrates for bacterial transglycosylases. *J Am Chem Soc* **123**: 3155-3156.



1038 Zhdanov, V.P., and Höök, F. (2015) Kinetics of enzymatic reactions in lipid membranes  
1039 containing domains. *Physical Biology* **12**: 026003.  
1040  
1041

1042 **FIGURE LEGENDS**

1043 **Figure 1. FRET assay to monitor peptidoglycan synthesis in real time.** (A) Scheme of the  
1044 reactions of a class A PBP (GTase-TPase) with unlabelled lipid II and the two versions of  
1045 labelled lipid II, yielding a PG product that shows FRET. (B) Representative reactions curves  
1046 from FRET assays of detergent-solubilised PBP1B<sup>Ec</sup>. The enzyme (0.5  $\mu$ M) was mixed with  
1047 unlabelled lipid II, Atto550-labelled lipid II and Atto647n-labelled lipid II at a 1:1:1 molar  
1048 ratio (each 5  $\mu$ M), in the presence or absence of 2  $\mu$ M LpoB(sol). Reactions were performed  
1049 in the absence of antibiotic (left panel), with 1 mM ampicillin (Amp) or 50  $\mu$ M moenomycin  
1050 (Moe) (middle panel), or by omitting unlabelled lipid II (right panel). The numbers indicate  
1051 the corresponding lane of the gel in panel D. Samples were incubated for 1 h at 25°C. (C)  
1052 Averaged initial slopes from reaction curves obtained by the FRET assay for detergent-  
1053 solubilised *E. coli* PBP1B in the presence (blue) or absence (red) of LpoB, and in the  
1054 presence or absence of ampicillin. Values are normalised relative to the slope in the absence  
1055 of activator for each condition and are mean  $\pm$  SD of 2-3 independent experiments. (D)  
1056 Aliquots at the end of the reactions shown in B were boiled and analysed by SDS-PAGE  
1057 using fluorescence detection of the acceptor (Atto647n), lanes are labelled with the reaction  
1058 numbers in B. (E) and (F), PBP1B<sup>Ec</sup> (0.5  $\mu$ M) was incubated with 5  $\mu$ M each of lipid II-  
1059 Atto647n, lipid II-Atto550 and <sup>14</sup>C-labelled lipid II. At indicated time points, aliquots were  
1060 taken and reactions were stopped by addition of moenomycin. After measuring fluorescence  
1061 (E), the PG was digested with the muramidase cellosyl, and the resulting muropeptides were  
1062 reduced with sodium borohydride and separated by HPLC (F). The structures of  
1063 muropeptides corresponding to peaks 1-3 are shown next to the chromatograms. (G)  
1064 Quantification of peak 2 (GTase product, blue), peak 3 (GTase+TPase, black) or the sum of  
1065 both 2 and 3 (yellow) from chromatograms in F, along with the FRET signal (red) calculated  
1066 as ratio of acceptor emission over donor emission from data in E.

1067

1068 **Figure 2. The FRET assay for PG synthesis can be adapted for reactions on liposomes.**

1069 (A) Class A PBPs were reconstituted in *E. coli* polar lipid liposomes. To assess the  
1070 orientation of the liposome-reconstituted PBPs, MGC-<sup>64</sup>PBP1B-his C777S C795S containing  
1071 a single cysteine in the N-terminal region was reconstituted as in A. The accessibility of the  
1072 cysteine was determined by staining with sulfhydryl-reactive fluorescent probe,  
1073 AlexaFluor555-maleimide, in the presence or absence of Triton X-100 (TX). Samples were  
1074 analysed by SDS-PAGE with fluorescence scanning to detect labelled protein followed by

1075 Coomassie staining. **(B)** To perform activity assays in liposomes, class A PBPs were  
1076 reconstituted along a 1:1 molar ratio mixture of Atto550-labelled lipid II and Atto647n-  
1077 labelled lipid II in liposomes as in **A**. Reactions were started by addition of unlabelled lipid II  
1078 in the presence or absence of lipoprotein activators (lpo). Using this methodology, we  
1079 monitored the activity of PBP1B<sup>Ec</sup> (**C-D**), PBP1B<sup>Ab</sup> (**E-F**) and PBP1B<sup>Pa</sup> (**G-H**).  
1080 Representative reactions curves are shown. Reactions were carried out in the presence (blue  
1081 lines) or absence (red lines) of the lipoprotein activators (LpoB(sol) for PBP1B<sup>Ec</sup>,  
1082 LpoP<sup>Ab</sup>(sol) for PBP1B<sup>Ab</sup> and LpoP<sup>Pa</sup>(sol) for PBP1B<sup>Pa</sup>), and either in the absence of  
1083 antibiotic (left) or in the presence of 1 mM ampicillin (Amp) or 50  $\mu$ M moenomycin (Moe,  
1084 black and yellow lines) (middle). For PBP1B<sup>Ec</sup>, control reactions in the absence of unlabelled  
1085 lipid II (right panel) are also shown. Products were analysed by SDS-PAGE followed by  
1086 fluorescence scanning at the end of reactions (right side). Curves are numbered according the  
1087 corresponding lane on the SDS-PAGE gels. PBP1B<sup>Ec</sup>, PBP1B<sup>Ab</sup> and PBP1B<sup>Pa</sup> were  
1088 reconstituted in EcPL liposomes containing labelled lipid II (0.5 mol% of lipids, 1:1 molar  
1089 ratio mixture of atto550-labelled lipid II and Atto647n-labelled lipid II), at protein to lipid  
1090 molar ratios of 1:3000, 1:2000 and 1:3000, respectively. Reactions were started by adding  
1091 unlabelled lipid II (final concentration 12  $\mu$ M) and incubated at 37°C for 60 min (PBP1B<sup>Ec</sup>  
1092 and PBP1B<sup>Ab</sup>) or 90 min (PBP1B<sup>Pa</sup>) while monitoring fluorescence at 590 and 680 nm with  
1093 excitation at 522 nm. **(D)**, **(F)** and **(H)** show averaged initial slopes from reaction curves  
1094 obtained by the FRET assay for liposome-reconstituted PBP1B<sup>Ec</sup>, PBP1B<sup>Ab</sup> and PBP1B<sup>Pa</sup>,  
1095 respectively, in the presence (blue) or absence (red) of lipoprotein activators and in the  
1096 presence or absence of ampicillin. Values are normalised relative to the slope in the absence  
1097 of activator and are mean  $\pm$  variation of 2 independent experiments.

1098

1099 **Figure 3. Addition of lipid II slows down diffusion of PBP1B on supported lipid**  
1100 **bilayers. (A)** Schematic illustration of the approach (not to scale). A single-cysteine version  
1101 of PBP1B<sup>Ec</sup> (MGC-<sup>64</sup>PBP1B-his C777S C795S) labelled with fluorescent probe Dy647 in its  
1102 single Cys residue (PBP1B<sup>Ec</sup>-Dy647) was reconstituted into a polymer-supported lipid  
1103 membrane formed with *E. coli* polar lipids and its diffusion was monitored using TIRF  
1104 microscopy in the presence or absence of substrate lipid II. **(B)** Single-molecule TIRF  
1105 micrograph of PBP1B<sup>Ec</sup>-Dy647 diffusing in the lipid membrane in the presence of 1.5  $\mu$ M  
1106 lipid II (corresponding to Movie 1). Calculated particle tracks are overlaid. **(C)** Histograms of  
1107 diffusion coefficients ( $D_{\text{coef}}$ ) of PBP1B<sup>Ec</sup>-Dy647 particles in the presence (red) or absence  
1108 (black) of lipid II. The average  $D_{\text{coef}}$  decreased from  $0.23 \pm 0.06 \mu\text{m}^2/\text{s}$  to  $0.1 \pm 0.04 \mu\text{m}^2/\text{s}$  upon

1109 addition of lipid II. Values are mean  $\pm$  SD of tracks from 3 independent experiments. **(D)**  
1110 Representative tracks for diffusing PBP1B<sup>Ec</sup>-Dy647 particles in the absence (black, top) or  
1111 presence of lipid II (red, bottom), showing the absence of confined motion in the presence of  
1112 lipid II. **(E)** Displacement distributions of PBP1B<sup>Ec</sup>-Dy647 particles (solid lines) in the  
1113 absence (left) or presence (right) of lipid II were analysed using a Rayleigh model  
1114 incorporating two populations of particles, a fast-diffusing one (grey dashed lines) and a  
1115 slow-diffusing one (black dashed lines). In the absence of lipid II, only 8 $\pm$ 5% of the steps  
1116 were classified into the slow fraction (121 $\pm$ 6nm average displacement), while the majority of  
1117 steps were of 257 $\pm$ 6 nm (fast fraction). The slow fraction increased upon addition of lipid II  
1118 to 37 $\pm$ 5% of the steps, with an average displacement of 132 $\pm$ 16 nm.

1119

1120 **Figure 4. FRET assay on a planar lipid membrane.** **(A)** FRET acquisition by TIRF  
1121 microscopy. PBP1B<sup>Ec</sup> was reconstituted into a polymer supported lipid membrane to preserve  
1122 its lateral diffusion. A supported lipid membrane was formed from *E. coli* polar lipid extract  
1123 supplemented with 0.5 mol% of labelled lipid II (Atto550 and Atto647n at 1:1 ratio). To  
1124 initiate PG polymerization unlabelled lipid II (10  $\mu$ M) and of LpoB(sol) (4  $\mu$ M) were added  
1125 from the bulk solution. An increase in FRET efficiency was recorded by dual-colour TIRF  
1126 microscopy: the acceptor (lipid II-Atto647n) was photobleached and the concomitant increase  
1127 in the donor intensity (lipid II-Atto550) was recorded within a delay of 1 s. **(B)** FRET  
1128 kinetics of PG polymerization and cross-linking. Inhibition of PBP1B<sup>Ec</sup> TPase activity with  
1129 1 mM ampicillin did not produce any changes in the donor intensity, confirming that FRET  
1130 signal is specific to cross-linked PG. A sigmoid (straight lines) was fitted to the data to  
1131 visualise the lag in the increase of FRET signal. **(C)** FRET efficiency was measured after a  
1132 round of PG synthesis before and after digestion with the muramidase cellosyl. After cellosyl  
1133 digestion, FRET efficiency decreased by 2.5-fold, resulting in a FRET signal comparable to  
1134 the one of a control surface with a GTase-defective PBP1B<sup>Ec</sup>(E233Q), performed in parallel.  
1135 Each dot corresponds to a different surface area within the same sample. **(D)** Quantification  
1136 of the diffusion coefficient of lipid II-Atto647n over the time course of PG polymerization  
1137 (left panel) from the experiment presented in **B**, calculated from the dynamics of the recovery  
1138 of lipid II-Atto647n signal within the photobleached ROI. **(E)** Quantification of the fraction  
1139 of immobile lipid II-Atto647n from several experiments as the one depicted in **B**, each dot  
1140 represents the value from a different experiment. **(F)** Diffusion of lipid II-Atto647n or a  
1141 phospholipid bound probe labelled with Alexa 488 (SLB) was recorded in a FRAP assay,

1142 using a 1 s delay and dual-colour imaging, 30 min after initiation of PG synthesis by addition  
1143 of lipid II and LpoB(sol). Only the diffusion of lipid II, but not of a fluorescently labelled,  
1144 His<sub>6</sub>-tagged peptide attached to dioctadecylamine-tris-Ni<sup>2+</sup>-NTA, was affected by the  
1145 presence of ampicillin during the PG synthesis reaction.

1146

1147 **Figure 5. PG synthesis with labelled lipid II versions and detection of FRET.** (A) A  
1148 mixture of Atto550-lipid II, Atto647n-lipid II and unlabelled lipid II is utilized by a class A  
1149 PBP with or without inhibition of the TPase activity by a  $\beta$ -lactam. FRET can only occur  
1150 between fluorophores within the same glycan strand in linear glycan chains produced in the  
1151 presence of a  $\beta$ -lactam (left reaction, dashed arrows). When the TPase is active (right  
1152 reaction) FRET can occur either between probes within the same strand (dashed arrows) or  
1153 between probes on different strands of the cross-linked PG product (solid arrows). We  
1154 hypothesize that at any time only one labelled lipid II molecule occupies the two binding sites  
1155 in the GTase domain and that therefore two probes within the same strand are separated by at  
1156 least one subunit. As a result, average distances between probes in different strands may be  
1157 shorter than between probes within the same strand and thus inter-chain FRET contributes  
1158 stronger to the total FRET signal than intra-chain FRET. (B) Lipoprotein-stimulated PBPs  
1159 produced short chains when labelled lipid II versions were incubated in the absence of  
1160 unlabelled lipid II (e.g., Figure 1B and Figure 1- figure supplement 1C). In this situation  
1161 crosslinking does not occur due to the attachment of the probe to the mDAP residue in the  
1162 pentapeptide. Within these short strands intra-chain FRET is stronger than within the long  
1163 glycan strands depicted in (A), due to a shorter average distance between the probes.

1164

1165 **Figure 1 - figure supplement 1. FRET assay to monitor PG synthesis in real time.** (A)  
1166 Chemical structures of lipid II analogues used for the FRET assay. R corresponds to  
1167 Atto550n (donor) or Atto647n (acceptor) in the corresponding analogue. The chemical  
1168 structures of alkyne versions of Atto550 and Atto647n probes that were used for  
1169 derivatization are not published. Therefore the carboxylic variants are depicted here with an  
1170 asterisk indicating where the alkyne versions diverge. (B) Absorbance (dashed lines) and  
1171 fluorescence emission (solid lines) spectra for Atto550 (red lines) and Atto647n (blue lines).  
1172 (C) Fluorescence emission spectra taken at the end (t=1 h) of the reactions of *E. coli* PBP1B  
1173 shown in Figure 1B (t=60 min). (D) The same gel depicted in Figure 1D, but scanned using  
1174 the donor fluorescence (Atto550n).

1175

1176 **Figure 2 - figure supplement 1. Activity of membrane-reconstituted PBP1B<sup>Ec</sup> is optimal**  
1177 **in *E. coli* polar lipids at low ionic strength.** (A) Representative SDS-PAGE analysis of the  
1178 reconstitution of PBP1B<sup>Ec</sup> in liposomes made of *E. coli* polar lipids at a 1:3000 mol:mol  
1179 protein:lipid ratio. After reconstitution, proteoliposome samples (lane 1) were centrifuged at  
1180 low speed to remove aggregates and both pellet and supernatant samples were analysed  
1181 (lanes 2 and 3, respectively). The supernatant was subsequently used for PG synthesis  
1182 reactions. A gradient of PBP1B<sup>Ec</sup> (0.25, 0.41, 0.62, 0.82, 1.23 and 1.65 µg) was loaded as a  
1183 standard to estimate protein concentration by densitometry. (B), (C) and (D) Representative  
1184 chromatograms showing the muropeptide analysis of PG produced by detergent-solubilised  
1185 PBP1B<sup>Ec</sup> (B) or liposome-reconstituted PBP1B<sup>Ec</sup> in the presence or absence of NaCl (C and  
1186 D, respectively). The concentration of PBP1B<sup>Ec</sup> was 0.5 µM and, if added, that of LpoB(sol)  
1187 was 2 µM LpoB(sol). The reaction buffer contained 150 mM NaCl in B and C. Samples  
1188 were incubated at 37 °C for 60 min in B and 90 min in C and D. The labelled peaks  
1189 correspond to the muropeptides shown in Figure 1E. (E) Quantification of the total amount  
1190 of radioactivity incorporated into PG (left) or the ratio between the radioactivity of peaks 3  
1191 and 2 (indicative of the degree of crosslinking of the PG, right) for activity assays for  
1192 PBP1B<sup>Ec</sup> in liposomes in the same conditions as in D. Values are mean ± SD (or variation) of  
1193 at least two reactions.

1194

1195 **Figure 2 - figure supplement 2. The FRET assay for PG synthesis can be adapted for**  
1196 **reactions on liposomes.** (A) Spectra corresponding to *E. coli* PBP1B reactions shown in  
1197 Figure 2C, taken at t=60 min. (B) The same gels depicted in Figure 2C, but scanned using the  
1198 donor fluorescence (Atto550n). (C) Spectra corresponding to *A. baumannii* PBP1B reactions  
1199 shown in Figure 2E, taken at t=60 min. (D) Spectra corresponding to *P. aeruginosa* PBP1B  
1200 reactions shown in Figure 2G, taken at t=90 min.

1201

1202 **Figure 2 - figure supplement 3. Moenomycin does not affect FRET on liposomes with**  
1203 **lipid II-Atto550 and lipid II-647 in the absence class A PBPs.** (A) EcPL liposomes  
1204 incorporating an equimolar amount of lipid II-Atto550 and lipid II-Atto647n at 0.5%mol of  
1205 the total lipid contents where incubated in the presence of 12 µM lipid II and in the presence  
1206 (black line) or absence (red line) of 50 µM moenomycin for 60 min at 37 °C while  
1207 monitoring FRET as indicated in materials and methods. (B) Fluorescence spectra for the  
1208 samples described in A at the end of the incubation period (t=60 min).

1209

1210 **Figure 2 - figure supplement 4. Amino acid sequence comparison between LpoP**

1211 **homologues from *A. baumannii* and *P. aeruginosa*.** (A) In the genomes of *A. baumannii* and

1212 *P. aeruginosa* the gene encoding LpoP is present within the same operon as the gene

1213 encoding their cognate PBP1B. Both LpoP proteins are predicted lipoproteins with a

1214 disordered region between the N-terminal Cys and the C-terminal globular domain containing

1215 the tetratricopeptide repeats (TPR). LpoP<sup>Ab</sup> has a shorter disordered linker than LpoP<sup>Pa</sup>. (B)

1216 Sequence comparison between the globular regions of LpoP<sup>Ab</sup> (Ab) and LpoP<sup>Pa</sup> (Pa).

1217 Proteins sequences (minus the signal peptides) were aligned using T-COFFEE EXPRESSO

1218 and the resulting alignment was visualized using JALVIEW. Residues conserved in both

1219 proteins are highlighted in a darker colour.

1220

1221 **Figure 2 – figure supplement 5. LpoP<sup>Ab</sup> stimulates the glycosyltransferase activity of**

1222 **PBP1B<sup>Ab</sup>.** (A) Real-time glycosyltransferase activity assays using dansyl-lipid II and

1223 detergent-solubilised *A. baumannii* PBP1B (PBP1B<sup>Ab</sup>). PBP1B<sup>Ab</sup> (0.5 μM) was mixed with

1224 10 μM dansyl-lipid II in the presence or absence of soluble 0.5 μM *A. baumannii* LpoP

1225 (LpoP<sup>Ab</sup>(sol)). A control was performed by adding 50 μM moenomycin (black). Each data

1226 point represents mean ± SD of 3 independent experiments. (B) Averaged initial slopes from

1227 reaction curves in A. Values are normalised relative to the slope in the absence of activator

1228 and are mean ± SD of 3 independent experiments. (C) Time-course GTase assay by SDS-

1229 PAGE followed by fluorescence detection. Detergent-solubilised PBP1B<sup>Ab</sup> was incubated

1230 with 5 μM lipid II-Atto550 and 25 μM unlabelled lipid II in the presence or absence of 1.5

1231 μM LpoP<sup>Ab</sup>(sol). Reactions contained 1 mM Ampicillin to block transpeptidation. Aliquots

1232 were taken at the indicated times (in min), boiled and analysed by SDS-PAGE. A control in

1233 which only LpoP<sup>Ab</sup>(sol) was present is also shown.

1234

1235 **Figure 2 - figure supplement 6. PG synthesis activity of *A. baumannii* PBP1B in the**

1236 **presence of Triton X-100 followed by FRET.** (A) Representative FRET curves for activity

1237 assays using detergent-solubilised *A. baumannii* PBP1B (PBP1B<sup>Ab</sup>). PBP1B<sup>Ab</sup> (0.5 μM) was

1238 mixed with unlabelled lipid II, Atto550-labelled lipid II and Atto647n-labelled lipid II at a

1239 1:1:1 molar ratio (5 μM of each), in the presence or absence of 2 μM soluble *A. baumannii*

1240 LpoP (LpoP<sup>Ab</sup>(sol)). Controls were performed by adding 50 μM moenomycin in the absence

1241 (black) or presence (yellow) of LpoP<sup>Ab</sup>(sol). Reactions were performed without antibiotic

1242 (left), with 1 mM ampicillin (middle), or in the absence of unlabelled lipid II (right). The

1243 numbers indicate the corresponding lane of the gel in **C**. Samples were incubated for 60 min  
1244 at 30°C. **(B)** Averaged initial slopes from reaction curves obtained by the FRET assay for  
1245 detergent-solubilised PBP1B<sup>Ab</sup>, in the presence (blue) or absence (red) of LpoP, and in the  
1246 presence or absence of ampicillin. Values are normalised relative to the slope in the absence  
1247 of activator for each condition and are mean ± SD of 2 independent experiments. **(C)**  
1248 Aliquots after reactions in **A** were boiled and analysed by SDS-PAGE followed by  
1249 fluorescence detection. **(D)** Fluorescence emission spectra taken after reactions in **A** (t=60  
1250 min).

1251

1252 **Figure 2 - figure supplement 7. PG synthesis activity of *P. aeruginosa* PBP1B in the**  
1253 **presence of Triton X-100 followed by FRET.** **(A)** Representative FRET curves for activity  
1254 assays using detergent-solubilised *P. aeruginosa* PBP1B (PBP1B<sup>Pa</sup>). PBP1B<sup>Pa</sup> (0.5 µM) was  
1255 mixed with unlabelled lipid II, Atto550-labelled lipid II and Atto647n-labelled lipid II at a  
1256 1:1:1 molar ratio (5 µM of each), in the presence or absence of 2 µM soluble *P. aeruginosa*  
1257 LpoP (LpoP<sup>Pa</sup> (sol)). Controls were performed by adding 50 µM moenomycin in the absence  
1258 (black) or presence (yellow) of LpoP<sup>Pa</sup>(sol). Reactions were performed without of antibiotic  
1259 (left panel), with 1 mM ampicillin (middle panel), or in the absence of unlabelled lipid II  
1260 (right panel). The numbers indicate the corresponding lane of the gel in **C**. Samples were  
1261 incubated for 90 min at 37°C. **(B)** Averaged initial slopes from reaction curves obtained by  
1262 the FRET assay for detergent-solubilised PBP1B<sup>Pa</sup>, in the presence (blue) or absence (red) of  
1263 LpoP, and in the presence or absence of ampicillin. Values are normalised relative to the  
1264 slope in the absence of activator for each condition and are mean ± SD of 2-3 independent  
1265 experiments. **(C)** Aliquots after reactions in **A** were boiled and analysed by SDS-PAGE  
1266 followed by fluorescence detection. **(D)** Fluorescence emission spectra taken after reactions  
1267 in **A** (t=90 min).

1268

1269 **Figure 3 - figure supplement 1. Control of membrane fluidity and integrity upon**  
1270 **reconstitution of *E. coli* PBP1B.** **(A)** The fluidity of supported lipid bilayers is reduced  
1271 when increasing PBP1B<sup>Ec</sup> density. The diffusion of phospholipid probe DOPE-rhodamine in  
1272 the polymer-supported SLB was monitored by FRAP at different densities of PBP1B. The  
1273 fluidity of the membrane decreased (black line) while the immobile fraction increased  
1274 (orange line) with higher protein densities.

1275



1276 **Figure 3 - figure supplement 2. *E. coli* PBP1B is active after reconstitution in supported**  
1277 **lipid bilayers. (A) and (B)** PBP1B<sup>Ec</sup> was reconstituted on supported lipid bilayers prepared  
1278 with *E. coli* polar lipid extract in 1.1 cm<sup>2</sup> chambers. The protein to lipid ratio was 1:10<sup>5</sup>  
1279 (mol:mol). Reactions were started by adding 1 nmol of radiolabelled lipid II per chamber, in  
1280 the presence of LpoB(sol) (4 μM) moenomycin (100 μM). Three chambers were prepared for  
1281 each condition and samples were combined before the analysis. Chambers were incubated  
1282 overnight at 37 °C and the reaction was stopped by adding moenomycin. Cellosyl and Triton  
1283 X-100 were added to solubilize the membranes and digest the PG product. The resulting  
1284 muropeptide samples were concentrated, reduced with sodium borohydride and analysed by  
1285 HPLC. Full chromatograms are shown in **A**, while zoomed-in chromatograms are shown in  
1286 **B**. **(C) and (D)** PG synthesis occurs only in the membrane fraction of SLBs. PBP1B<sup>Ec</sup> was  
1287 reconstituted on SLBs as in **A** and **B**. In addition, control chambers were prepared without  
1288 PBP1B. Chambers were incubated over night to allow for PG synthesis and then washed with  
1289 fresh buffer. The washes and chambers (membranes) were treated and analysed as described  
1290 for **A** and **B**. Five chambers were combined for reactions with PBP1B<sup>Ec</sup>, and four chambers  
1291 for control reactions. Full chromatograms are shown in **C**, while zoomed-in chromatograms  
1292 are shown in **D**. The labelled peaks in all chromatograms correspond to the muropeptides  
1293 shown in Figure 1F.

1294

1295 **Figure 4 - figure supplement 1. Control of membrane fluidity and integrity during the**  
1296 **FRET assay. (A)** Fluorescence intensity profiles 1s after photobleaching taken from the  
1297 images depicted on Figure 4B. **(B)** Montage comparing the recovery of fluorescence after  
1298 photobleaching of a tracer (DODA-tris-Ni-NTA plus a His<sub>6</sub>-tagged peptide labelled with  
1299 AlexaFluor 488) with the one of lipid II-Atto647n on a supported lipid bilayer containing  
1300 PBP1B at a 1:10<sup>5</sup> protein:lipid (mol:mol) ratio. The assay was performed after a PG  
1301 synthesis reaction carried out for 1.5 h. The fact that fluorescence is recovered for both,  
1302 indicates that the membrane remains fluid while lipid II stays diffusive after the synthesis  
1303 reaction.

1304

1305 **Movie 1. Single-molecule imaging of PBP1B on supported lipid bilayers.** PBP1B<sup>Ec</sup>-  
1306 Dy647 was reconstituted in EcPL SLBs at a 1:10<sup>6</sup> (mol:mol) protein to lipid ratio and was  
1307 tracked using single-molecule TIRF before or after the addition of 1.5 μM lipid II. Images  
1308 were taken with a rate of 62 ms per frame.

1309

1310 **Movie 2. FRET assay on supported lipid bilayers.** PBP1B<sup>Ec</sup> was reconstituted in EcPL  
1311 SLBs at a 1:10<sup>5</sup> (mol:mol) protein to lipid ratio along lipid II-Atto647, lipid II-Atto550.  
1312 Membranes were incubated with 5 μM lipid II in the presence or absence of 1 mM ampicillin.  
1313 To detect FRET, the fluorescence of the acceptor Atto647n was bleached within a region. In  
1314 the subsequent frame the fluorescence of Atto550 increased indicating the presence of FRET.  
1315 In the presence of ampicillin this increase did not happen.  
1316  
1317 **Supplementary File 1:** table of oligonucleotides used in this study.

# Figure 1

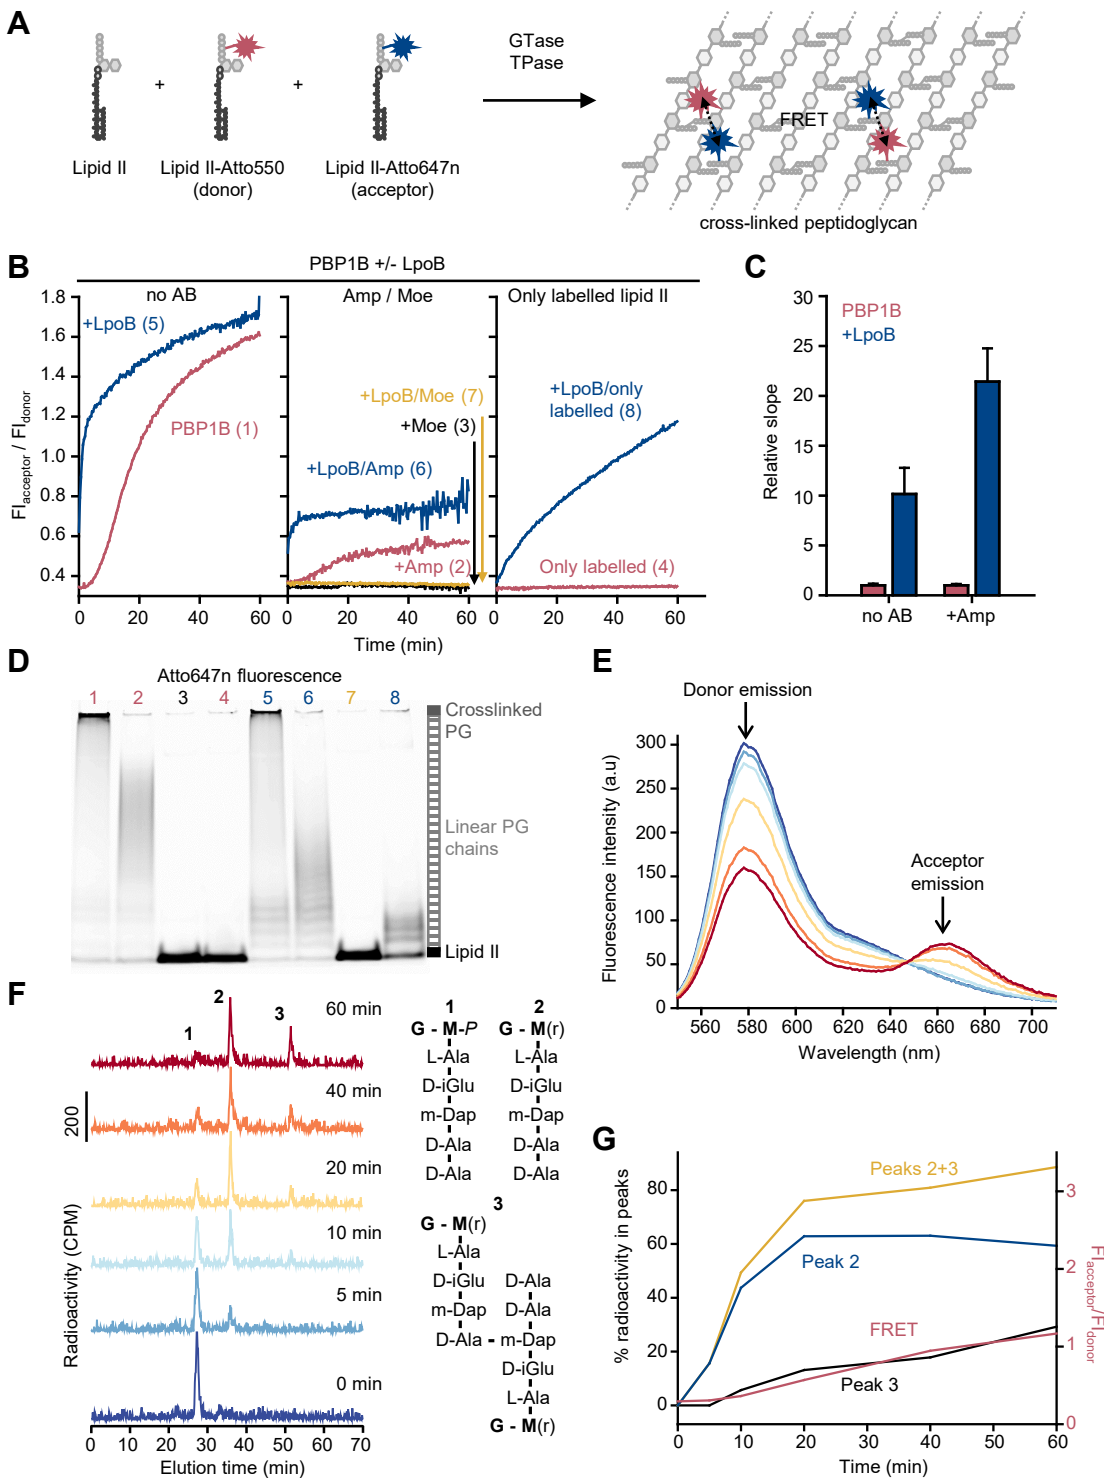

## Figure 2

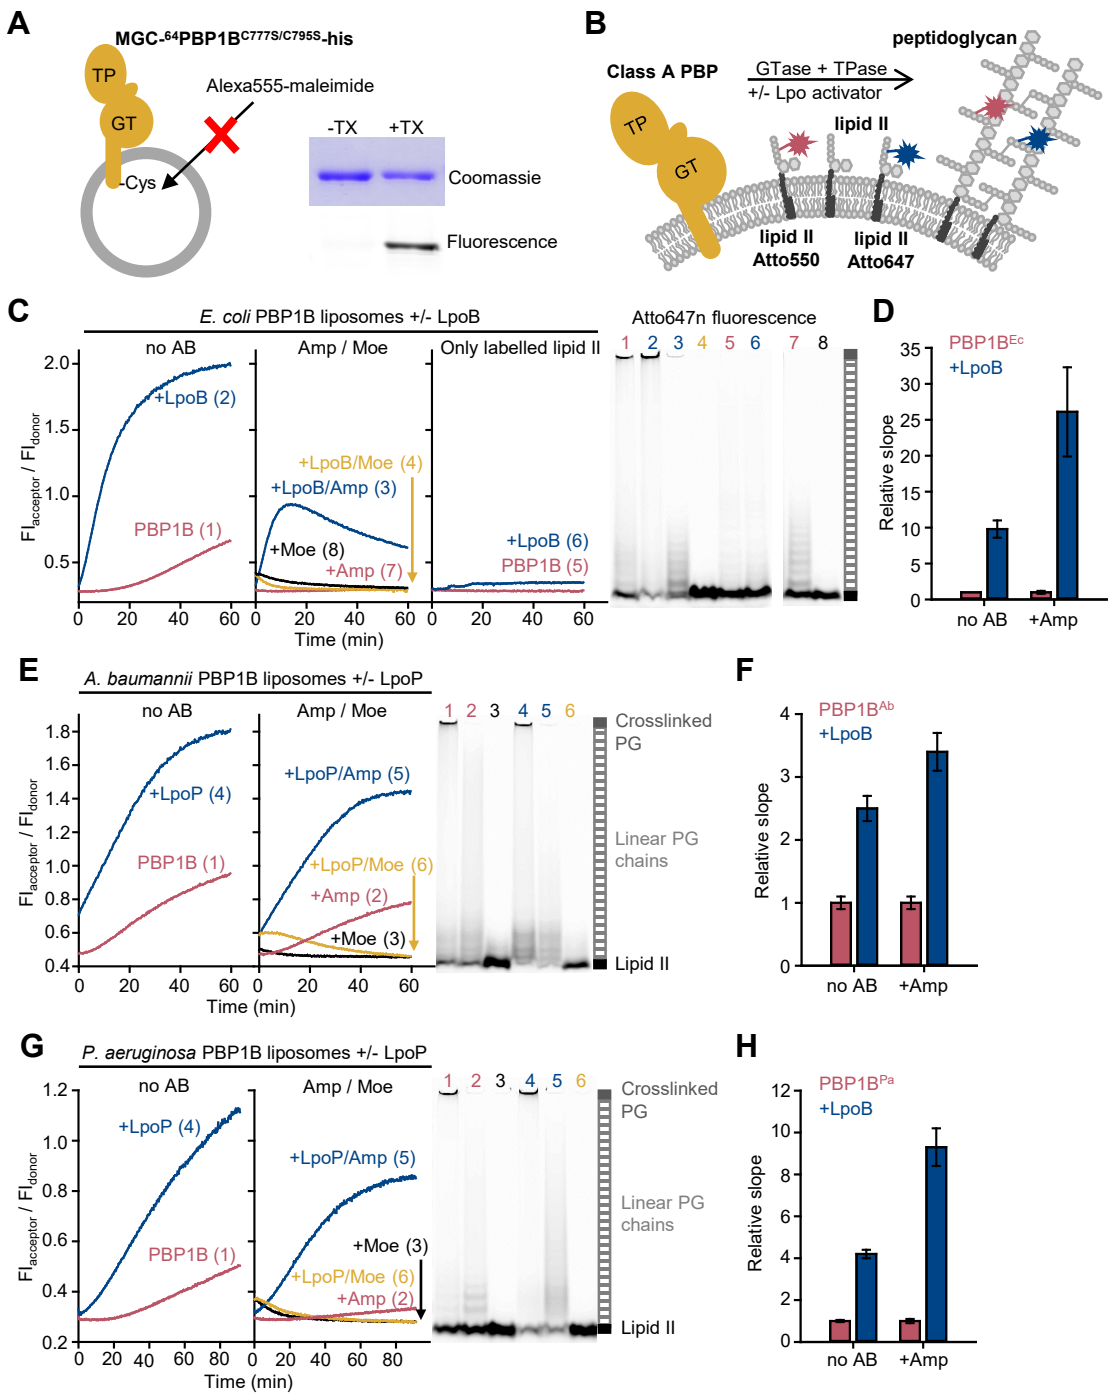

## Figure 3

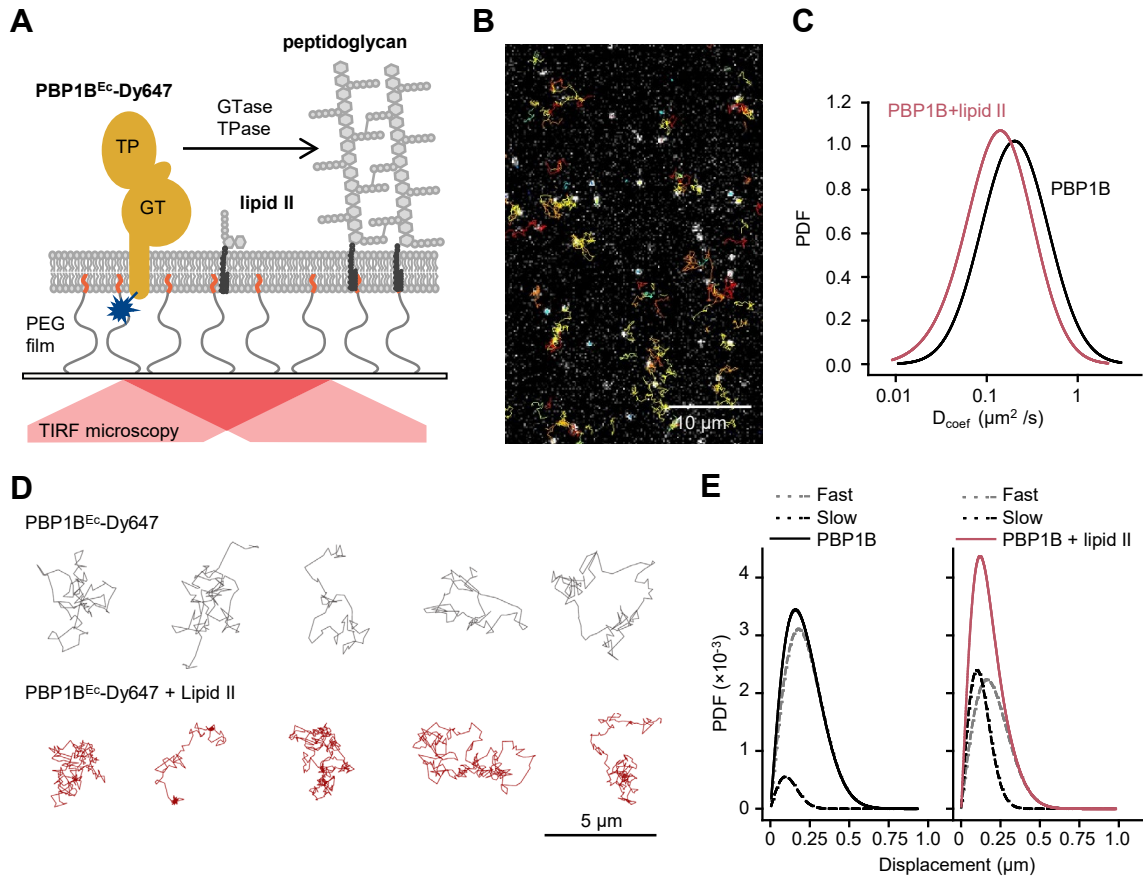

## Figure 4

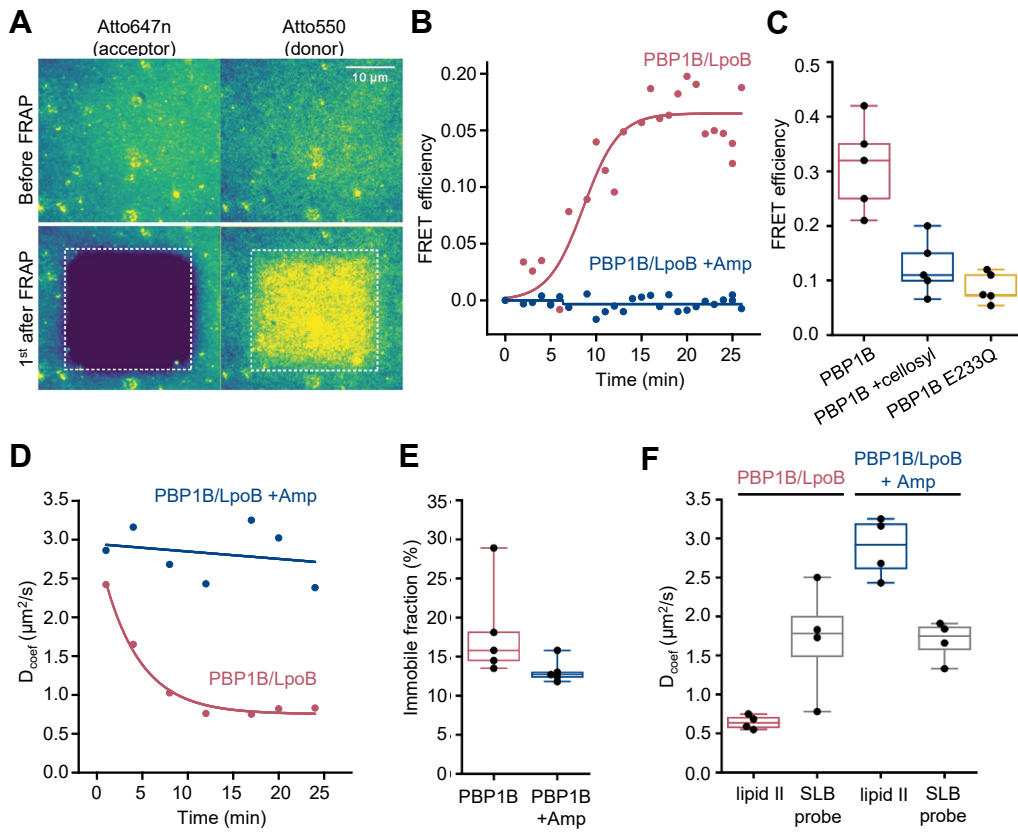

## Figure 5

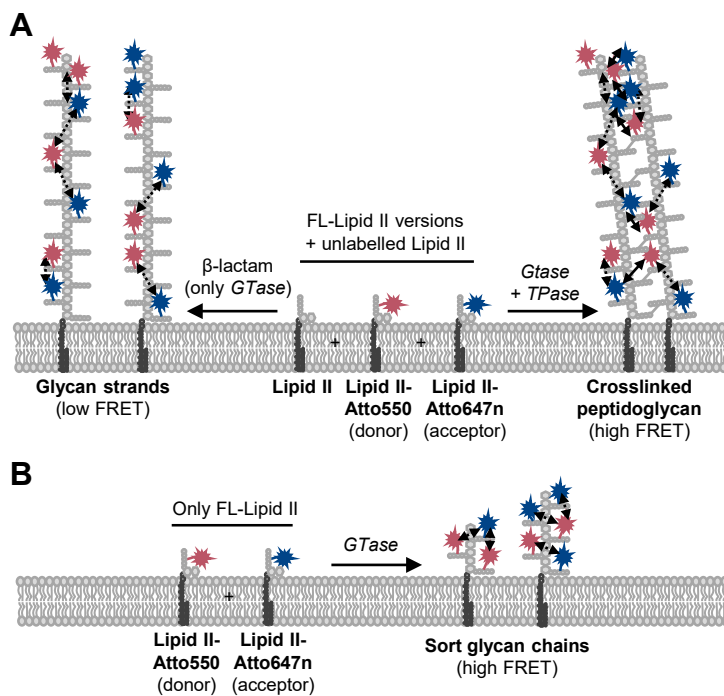

## Figure 1 – figure supplement 1

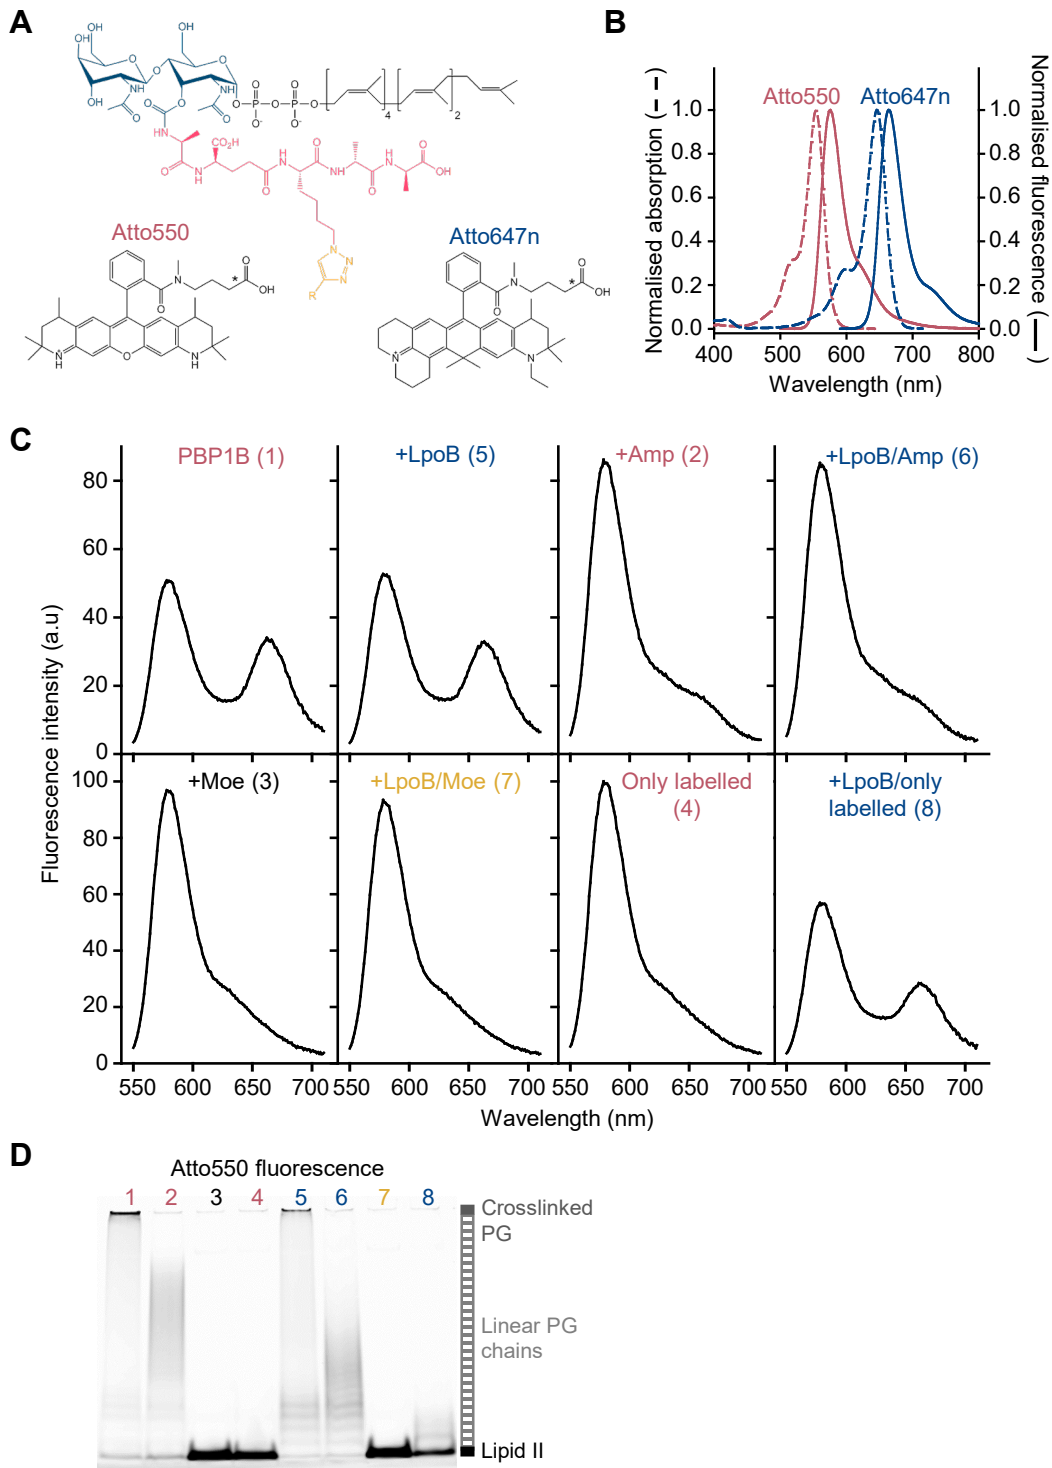



## Figure 2 – figure supplement 1

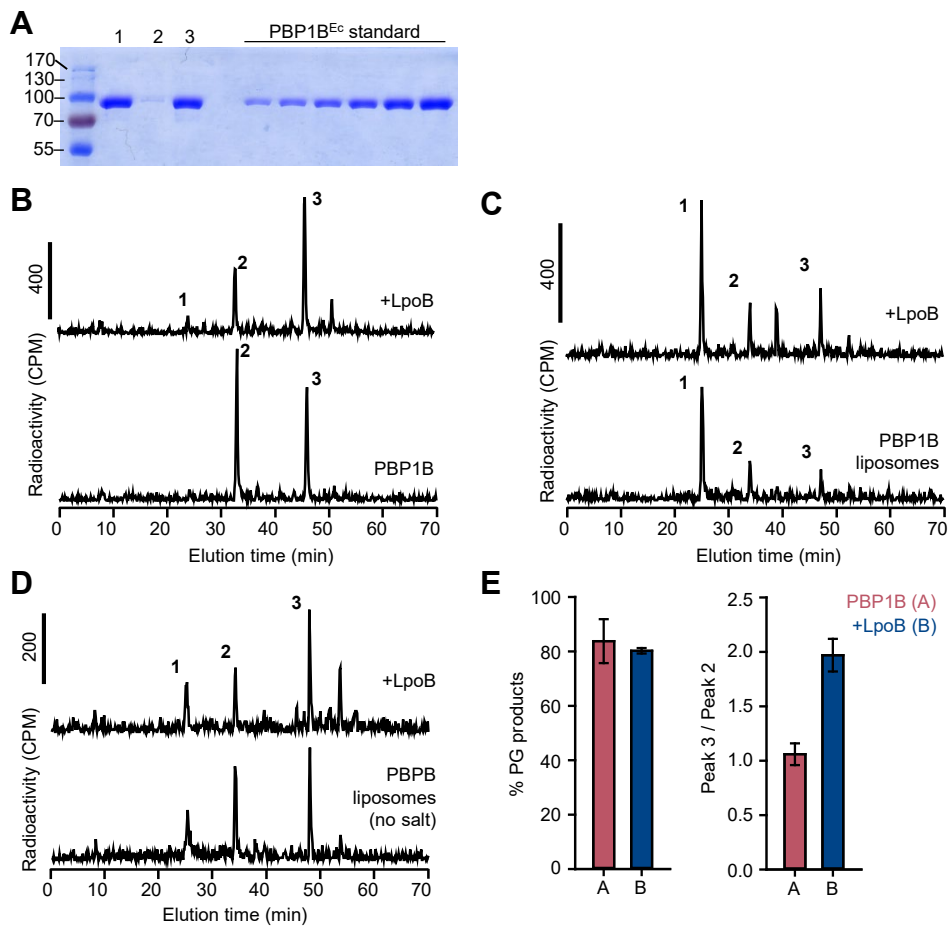

## Figure 2 – figure supplement 2

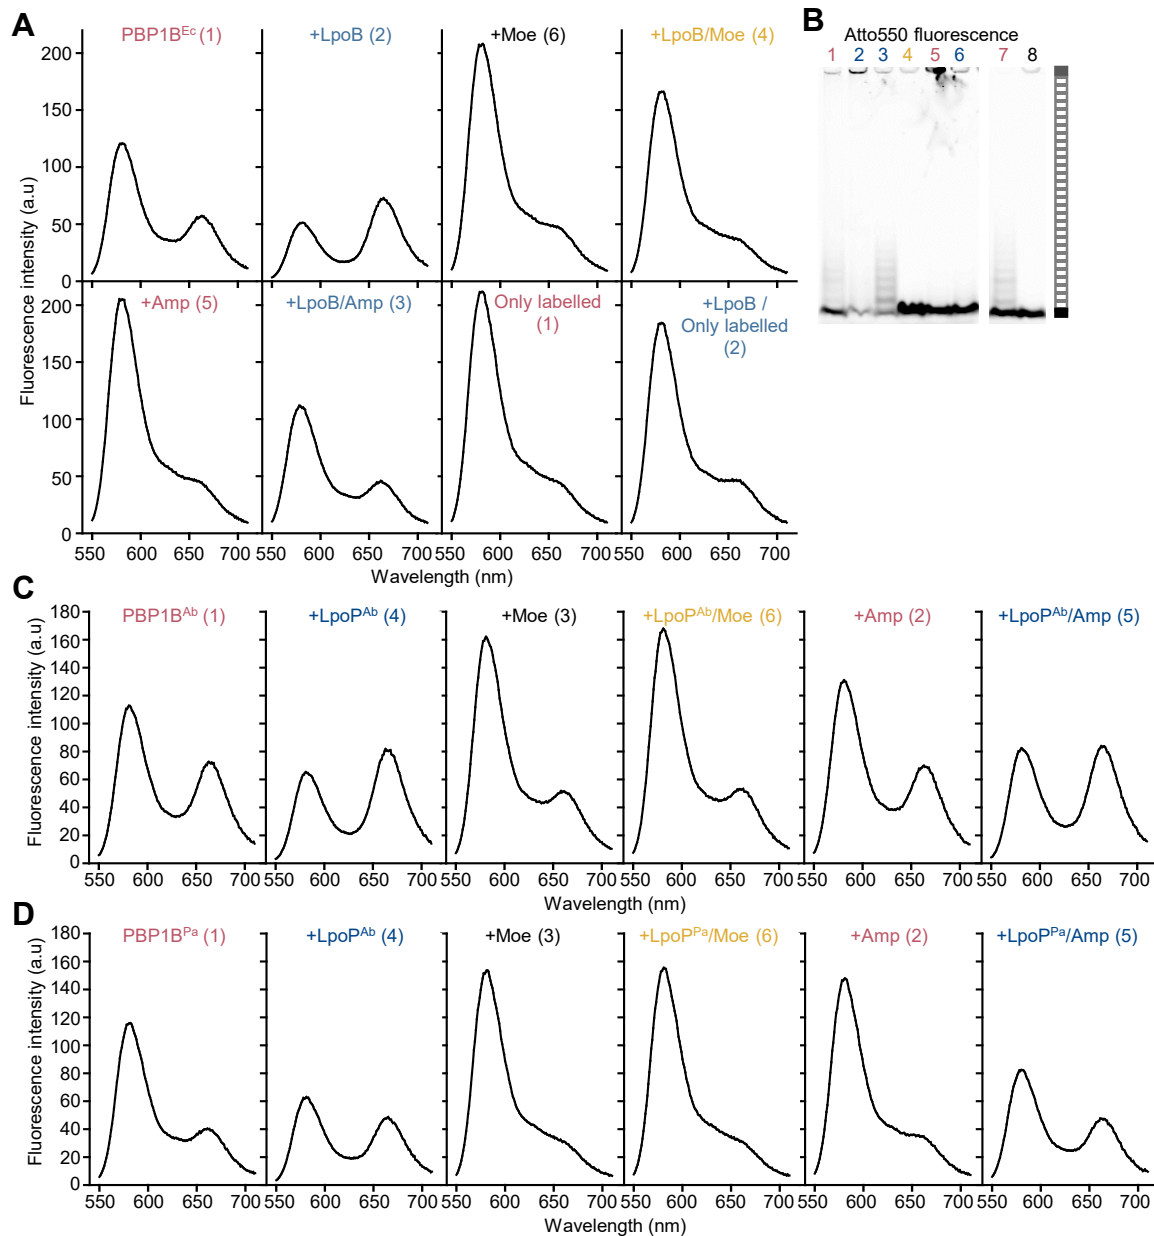

## Figure 2 – figure supplement 3

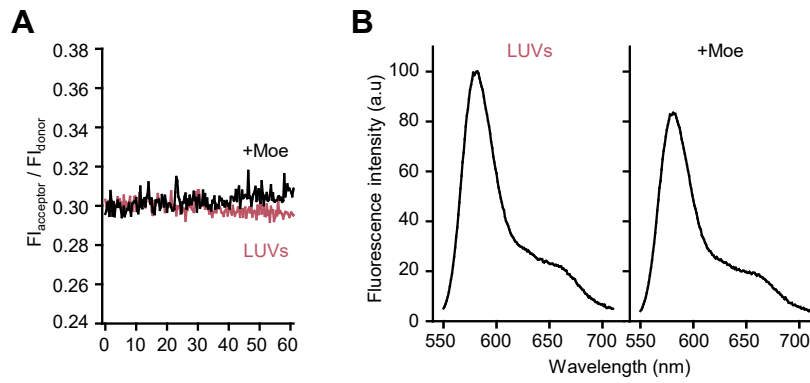



## Figure 2 – figure supplement 5

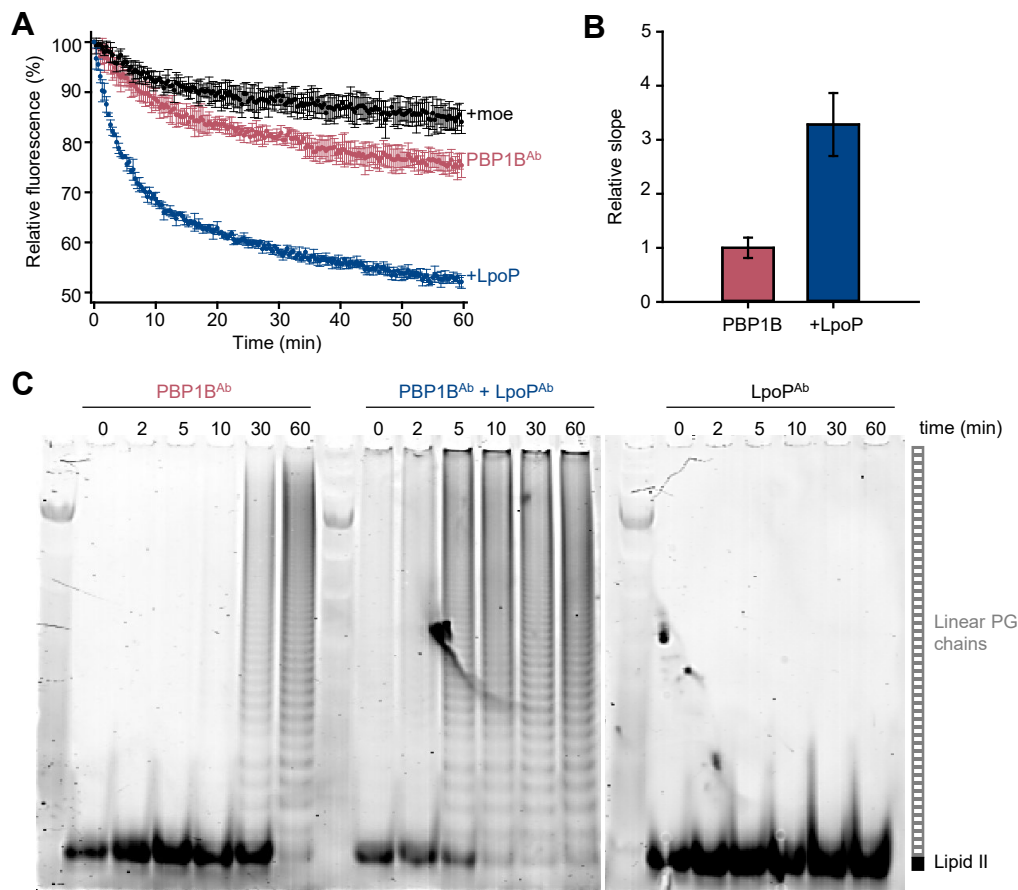

## Figure 2 – figure supplement 6

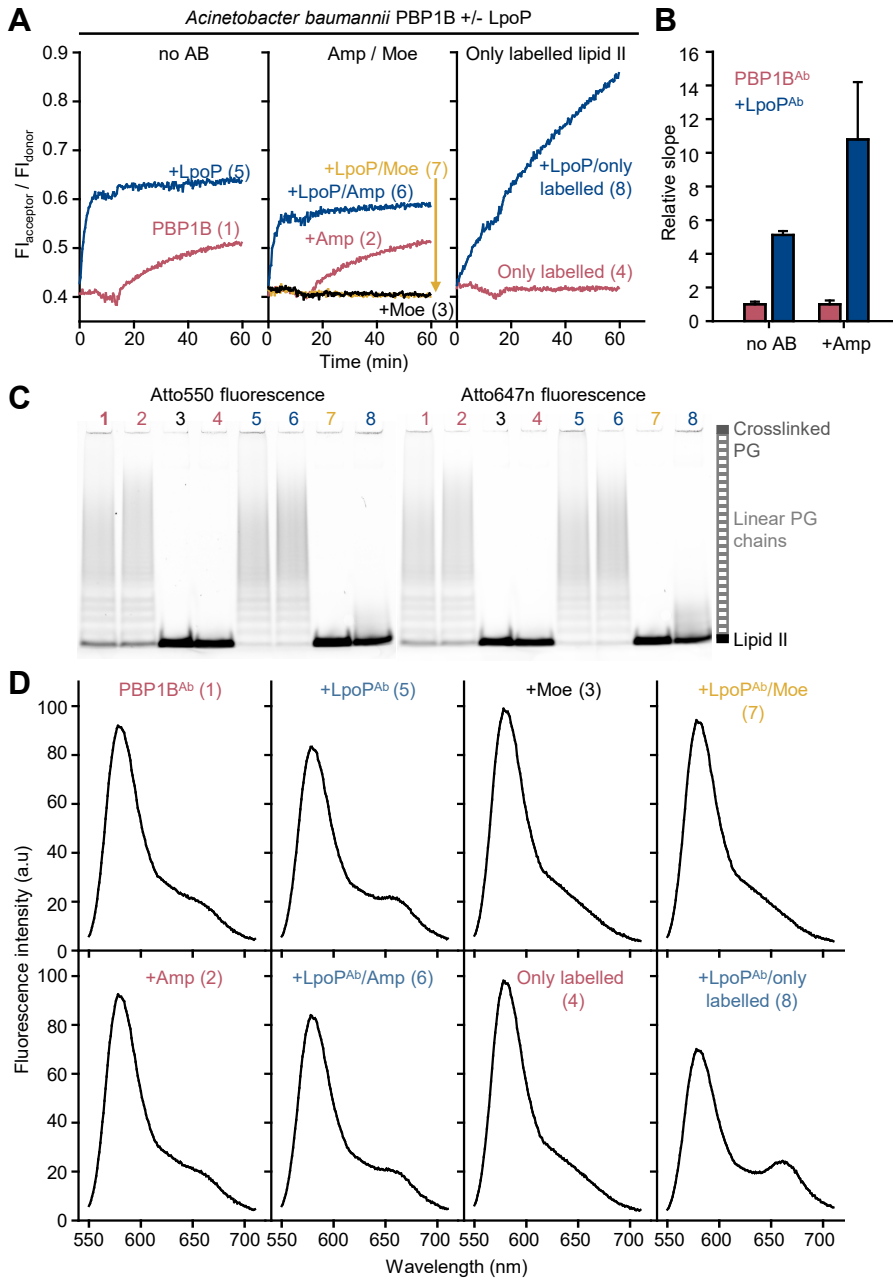

## Figure 2 – figure supplement 7

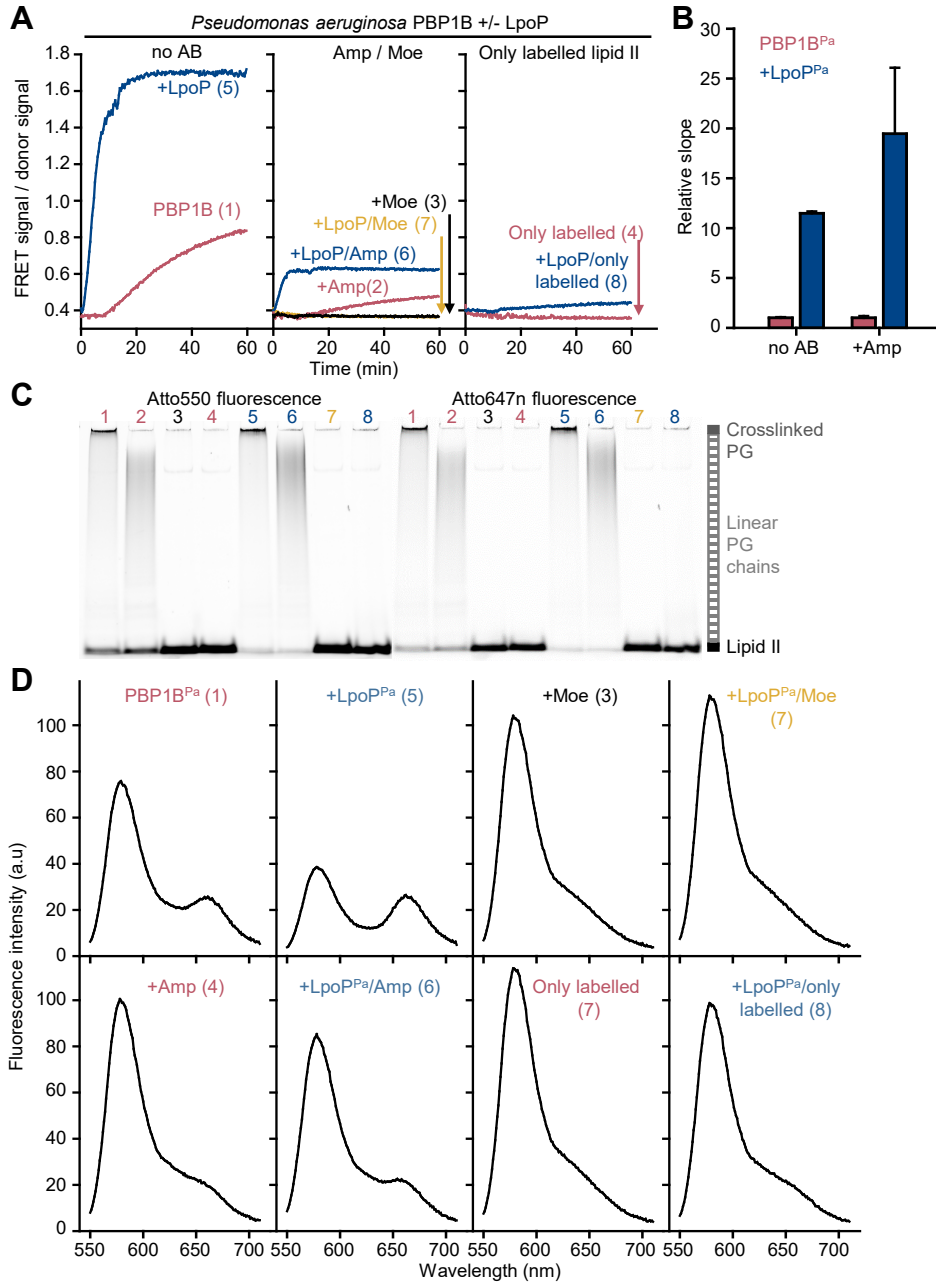

## Figure 3 – figure supplement 1

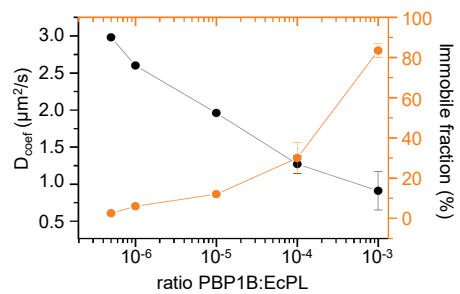



## Figure 3 – figure supplement 2

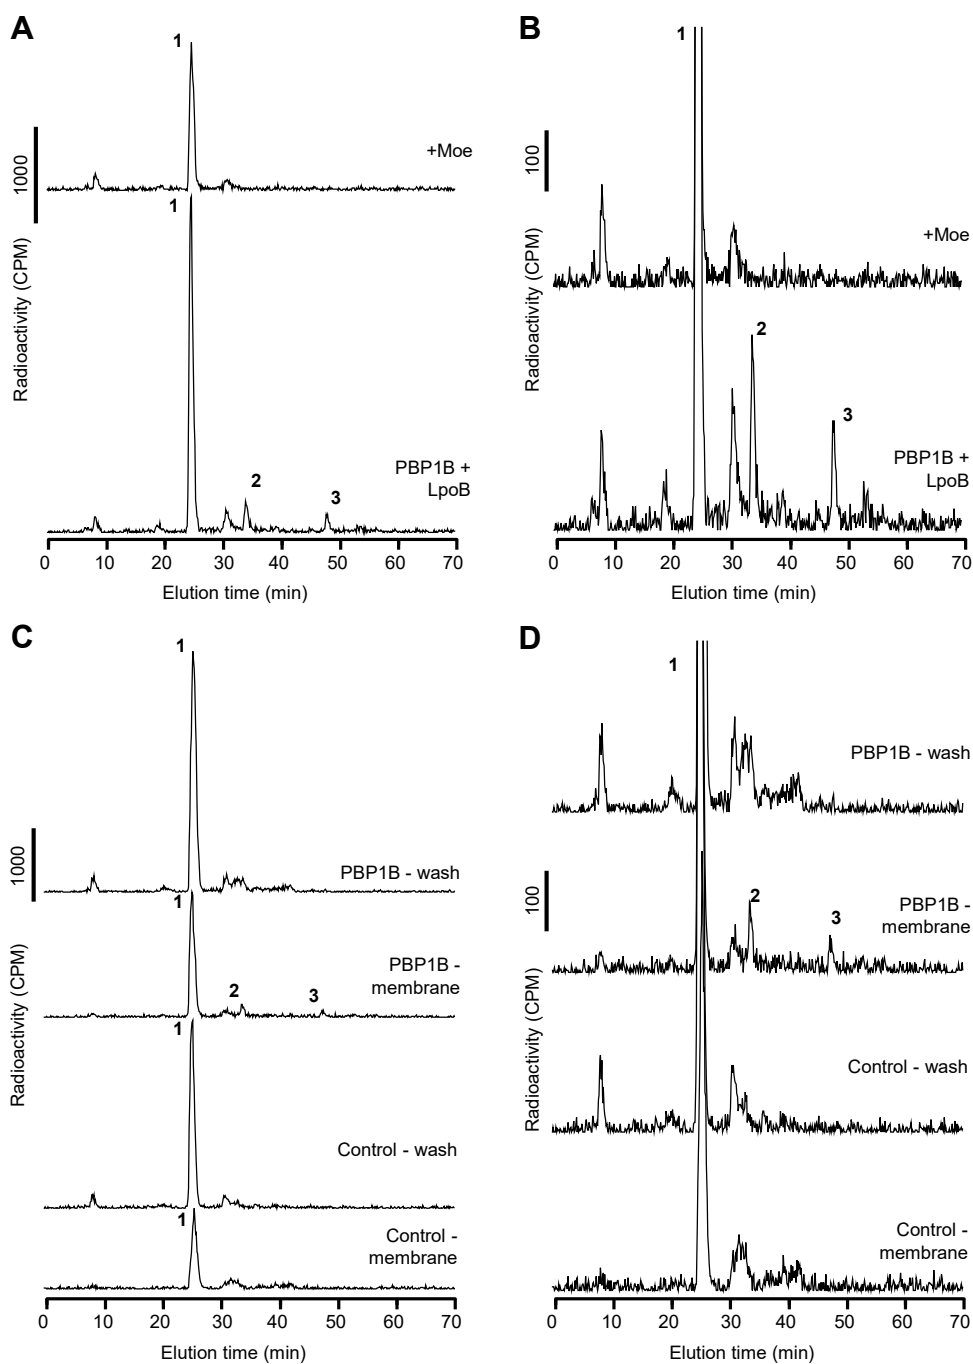

## Figure 4 – figure supplement 1

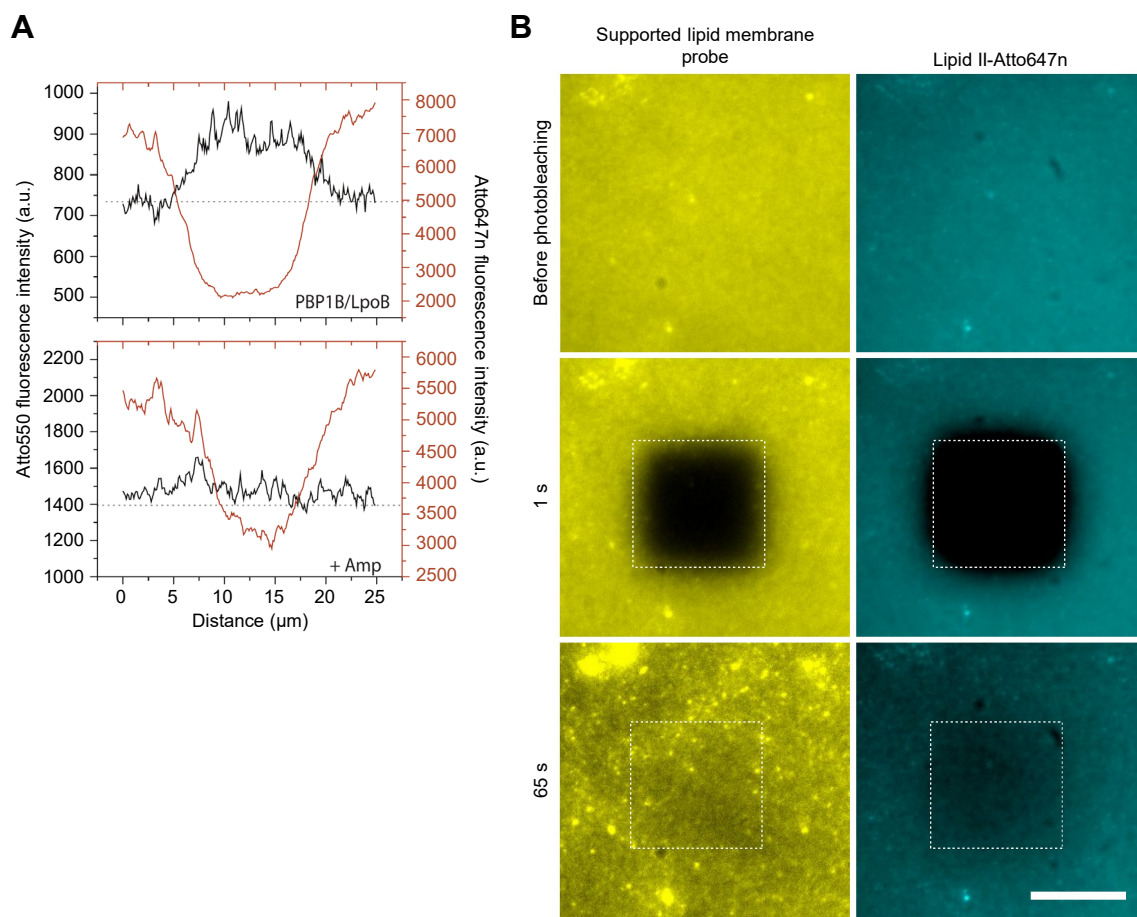

**Supplementary Table 1. Oligonucleotides used in this work.**

| <b>Name</b>            | <b>Sequence (5' to 3')</b>                     |
|------------------------|------------------------------------------------|
| PBP1B.Acineto-NdeI_f   | AGATATCATATGATGAAGTTTGAACGTGGTATC<br>GGTTTCTTC |
| PBP1B.Acineto-BamHI_r  | GCGGGATCCTTAGTTGTTATAACTACCACTTGA<br>AATG      |
| Seq1_rev_PBP1B_Acineto | AGGTTCTAAACGGGCAACTC                           |
| Seq2_fwd_PBP1B_Acineto | TGGTTATGGATTGGCCTCTC                           |
| Seq3_fwd_PBP1B_Acineto | CTGGGCAAGCCAGATTGAAG                           |
| Seq4_fwd_PBP1B_Acineto | ACAATTACGCCAGAC ACCAG                          |
| PBP1B-MGC-F            | CATCATCCATGGGCTGTGGCTGGCTATG<br>GCTACTGCTA     |
| PBP1B-CtermH-R         | CATCATCTCGAGATTACTACCAAACATATCCTT              |
| C777S-D                | AACTTTGTTTCCAGCGGTGGC                          |
| C777S-C                | GCCACCGCTGGAAACAAAGTT                          |
| C795S-D                | CAATCGCTGTCCCAGCAGAGC                          |
| C795S-C                | GCTCTGCTGGGACAGCGATTG                          |
